# Supplementary material for: Investigation of a global mouse methylome atlas reveals subtype-specific copy number alterations in pediatric cancer models
Source: Nat Genet. 2025 Dec 11;58(1):143–56. doi: 10.1038/s41588-025-02419-4 (PMC12807868; doi:10.1038/s41588-025-02419-4)
Supplement: Supplementary file 2 — Supplementary Tables 1–8. [file 41588_2025_2419_MOESM2_ESM.xlsx]

## Sheet: ST1_Novel_Mouse_Models
EGFR-/FGFR-driven glioma models	Strain	Location	Pup	Tumor	Latency
EGFR_vIII, EGFR_wt, Cdkn2a KO, Pten KO (n=12)	CD1	lateral ventricle	EP#2	yes	66
			EP#3	yes	36
			EP#4	yes	52
			EP#5	yes	45
	CD1	lateral ventricle	EP#7	yes	38
			EP#8	yes	41
			EP#17	yes	62
			EP#20	yes	54
			EP#24	yes	64
			EP#25	yes	33
			EP#42	yes	54
			EP#43	yes	40
EGFR_vIII, Cdkn2a KO, Pten KO (n=8)	Bl6/N	lateral ventricle	EP#85	yes	29
			EP#86	yes	38
			EP#100	yes	62
			EP#101	no	365
			EP#104	yes	59
			EP#105	no	365
			EP#106	no	365
			EP#102	yes	17
FGFR1_K656E, Nf1 KO (n=7)	Bl6/N	lateral ventricle	EP#199	yes	80
			EP#200	yes	17
			EP#201	yes	190
			EP#198	yes	18
			EP#202	yes	36
			EP#203	yes	44
			EP#204	yes	40
FGFR1_N546K, Cdkn2a KO(n=7)	CD1	lateral ventricle	#504	yes	62
			#507	yes	85
			#508	yes	114
			#510	yes	135
			#517	yes	363
			#518	no	365
	CD1	lateral ventricle	#411	no	365
FGFR1_K656E, Cdkn2a KO (n=7)	CD1	lateral ventricle	#282	yes	134
			#315	yes	186
			#355	yes	225
			#433	no	365
			#434	no	365
			#435	no	365
			#436	no	365
FGFR1_N546K, Trp53 KO (n=6)	CD1	lateral ventricle	#500	yes	42
			#501	yes	47
			#502	yes	48
			#503	yes	50
			#505	yes	56
			#506	yes	56
Infantile hemispheric glioma models	Strain	Location	Pup	Tumor	Latency
GOPC::ROS1, Trp53 KO (n=12)	CD1	lateral ventricle	EP#157	yes	45
			EP#158	yes	46
			EP#160	yes	60
			EP#161	yes	58
			EP#162	yes	40
			EP#163	yes	37
			EP#164	yes	36
			EP#165	yes	30
			EP#166	yes	43
			EP#167	yes	51
			EP#168	yes	37
			EP#169	yes	55
CLIP1::ROS1, Trp53 KO (n=10)	CD1	lateral ventricle	EP#187	yes	36
			EP#188	yes	355
			EP#189	yes	108
			EP#190	yes	43
			EP#191	yes	49
			EP#192	yes	51
			EP#194	yes	69
			EP#193	yes	29
			EP#195	yes	44
			EP#196	yes	60
ROS1_Ex35, Trp53 (n=3)	CD1	lateral ventricle	EP#205	yes	112
			EP#211	yes	90
			EP#212	yes	66
QKI::NTRK2, Cdkn2a KO (n=10)	CD1	lateral ventricle	#238	yes	40
			#239	yes	40
			#259	yes	67
			#260	yes	67
			EP87-90	yes	81
			#364	yes	293
			#414	no	365
	CD1	lateral ventricle	#291	yes	33
			#299	yes	43
			#302	yes	48
QKI::NTRK2, Trp53 KO (n=13)	CD1	lateral ventricle	#377	yes	31
			#378	yes	32
			#379	yes	35
			#380	yes	35
			#385	yes	39
			#393	yes	43
			#403	yes	49
	CD1	lateral ventricle	#298	yes	43
			#300	yes	45
			#301	yes	45
			#303	yes	50
			#325	yes	64
			#465	no	365
QKI::NTRK2, Trp53 KO (BL6, n=6)	Bl6/N	lateral ventricle	EP#181	yes	35
			EP#182	yes	35
			EP#183	yes	23
			EP#184	yes	24
			EP#185	yes	35
			EP#186	yes	35
MET_FL, Trp53 KO (n=7)	CD1	lateral ventricle	EP#137	yes	109
			EP#138	yes	84
			EP#141	yes	86
			EP#143	no	365
			EP#144	no	365
			EP#145	yes	117
			EP#146	no	365
TFG::MET (n=5)	CD1	lateral ventricle	EP#132	no	365
			EP#133	yes	106
			EP#134	no	365
			EP#135	yes	87
			EP#136	yes	138
BRAF- & NF1-related models	Strain	Location	Pup	Tumor	Latency
BRAF_V600E, Cdkn2a KO (n=23)	CD1	lateral ventricle	EP#58	yes	365
			EP#59	no	365
			EP#60	no	365
			EP#61	yes	28
			EP#62	yes	22
			EP#63	no	365
			EP#64	yes	365
			EP#65	yes	59
			EP#116	yes	269
			EP#117	no	365
			EP#118	yes	228
			EP#119	no	365
			EP#120	no	365
			EP#121	no	365
			EP#122	no	365
			EP#123	no	365
			EP#124	no	365
			EP#125	no	365
			EP#126	yes	279
			EP#127	no	365
			EP#128	no	365
			EP#129	yes	117
			EP#130	no	365
Trp53 KO, Nf1 KO (n=13)	CD1	4th ventricle	EP001.1	no	365
	CD1	4th ventricle	EP011.1	no	365
	CD1	4th ventricle	EP016.3	no	365
			EP016.4	no	365
			EP016.6	no	365
			EP016.7	no	365
			EP016.8	yes	330
			EP016.9	no	365
			EP016.10	no	365
	CD1	4th ventricle	EP#142	no	365
			EP#155	no	365
			EP#156	no	365
			EP#180	no	365
PDGFRA-related glioma models	Strain	Location	Pup	Tumor	Latency
PDGFRA_D842V, Trp53 KO (n=8)	CD1	lateral ventricle	EP#49	no	365
			EP#50	yes	64
			EP#51	yes	72
			EP#52	yes	42
			EP#53	yes	62
			EP#54	yes	119
			EP#55	yes	59
			EP#56	yes	27
PDGFRA_D842V, H3.3_G34R, Trp53 KO, ATRX KO (n=12)	CD1	lateral ventricle	EP002.1	no	365
	CD1	lateral ventricle	EP015.1	yes	65
			EP015.2	yes	78
			EP015.3	yes	83
			EP015.5	no	365
			EP015.6	yes	54
			EP015.8	yes	62
			EP015.12	yes	67
			EP015.14	yes	93
			EP015.16	yes	147
			EP015.17	yes	304
			EP015.18	no	365

## Sheet: ST2_CpG_Mouse_Human
EPIC	mouse
cg00003305	cg44459562_BC11
cg00024494	cg46135802_TC21
cg00025647	cg47084173_TC21
cg00051154	cg37213881_BC11
cg00084338	cg34675245_BC21
cg00123104	cg41704123_BC21
cg00158789	cg29876070_BC21
cg00186909	cg28882172_TC21
cg00219169	cg31254389_TC21
cg00221709	cg44695387_BC11
cg00237391	cg34787392_BC21
cg00253658	cg45997931_BC21
cg00279790	cg41311496_TC21
cg00515814	cg46705582_TC21
cg00515954	cg28825609_BC21
cg00539347	cg29190270_BC21
cg00742851	cg43817770_BC21
cg00781110	cg46804925_TC21
cg00799539	cg28800075_BC21
cg00852595	cg28825610_BC21
cg00860354	cg46303269_BC21
cg00868875	cg35460162_TC21
cg00895196	cg31377799_BC21
cg00931644	cg32859921_BC21
cg00946992	cg30618736_TC21
cg00954105	cg30137286_TC21
cg00995986	cg29289484_BC21
cg01003448	cg34751060_TC21
cg01019875	cg29717442_TC11
cg01107874	cg32256679_BC21
cg01152019	cg38559294_BC11
cg01161204	cg46706068_BC21
cg01214458	cg42586099_TC21
cg01220192	cg46569276_BC21
cg01229787	cg44670058_TC21
cg01331810	cg41849084_TC21
cg01332054	cg46804073_BC21
cg01341751	cg30015572_BC11
cg01440489	cg32730917_BC21
cg01586506	cg33547376_TC11
cg01594260	cg30472204_BC11
cg01623261	cg30287227_BC21
cg01657761	cg44703948_BC21
cg01747862	cg45726518_BC21
cg01807688	cg47641276_BC21
cg01828474	cg48141476_TC11
cg01862363	cg29689610_BC21
cg01891583	cg33890631_BC11
cg01933405	cg43254093_TC21
cg01942558	cg38380355_TC21
cg01967399	cg45726798_TC21
cg01984304	cg42540956_BC21
cg02051771	cg35609334_BC21
cg02196651	cg42300876_BC21
cg02227188	cg33839465_TC21
cg02254407	cg44917564_BC21
cg02284273	cg38005641_BC21
cg02293118	cg29210576_BC21
cg02332491	cg33754051_TC21
cg02458237	cg29615608_BC21
cg02497558	cg29979909_TC21
cg02520212	cg42822004_TC21
cg02527886	cg42958534_BC11
cg02534659	cg31791774_TC21
cg02555243	cg44131167_TC21
cg02573468	cg38864501_BC21
cg02582848	cg37873257_BC21
cg02607810	cg41860619_BC21
cg02619656	cg46143662_BC21
cg02644510	cg43210492_BC21
cg02658043	cg33504576_BC21
cg02723558	cg38796728_BC21
cg02729303	cg33162878_BC21
cg02741229	cg35615549_BC11
cg02741882	cg45126037_BC21
cg02767242	cg38451317_BC21
cg02794451	cg43906494_BC21
cg02874942	cg46502836_BC21
cg02994463	cg32755631_BC21
cg03048432	cg30757245_BC21
cg03052078	cg28165690_BC21
cg03074188	cg45511751_TC21
cg03086707	cg35615116_TC21
cg03148231	cg44763354_TC11
cg03199564	cg42056119_TC21
cg03227775	cg42958590_BC11
cg03434780	cg34355316_TC21
cg03435439	cg41205695_BC11
cg03482973	cg45385976_TC21
cg03492327	cg32455440_BC21
cg03514381	cg40672038_BC21
cg03534481	cg34485020_TC21
cg03552293	cg34186868_TC21
cg03556243	cg34177097_TC11
cg03588998	cg32309561_BC11
cg03699566	cg44929810_BC21
cg03722909	cg35973798_BC21
cg03779374	cg34177095_TC11
cg03835609	cg35615358_TC21
cg03854238	cg31378354_BC21
cg03877829	cg35571892_BC11
cg03905867	cg38773200_BC21
cg03906434	cg43427818_BC21
cg03917138	cg30175143_TC21
cg03917666	cg31230301_TC21
cg03918304	cg38558344_TC21
cg03946532	cg46211707_BC21
cg03953626	cg34885957_BC21
cg03974889	cg42540970_BC21
cg04046669	cg29191318_BC21
cg04065086	cg40048883_BC21
cg04074001	cg45863251_TC11
cg04090745	cg34863199_BC21
cg04102510	cg37850166_TC21
cg04104463	cg39521537_TC21
cg04111789	cg34983412_BC21
cg04134748	cg41778419_BC21
cg04173396	cg40593748_BC21
cg04228935	cg34507216_TC21
cg04293307	cg30139105_BC21
cg04294437	cg45969587_BC21
cg04308274	cg47619144_TC11
cg04359602	cg32477641_BC21
cg04439215	cg32694383_TC21
cg04508701	cg28232441_BC11
cg04559779	cg39521545_TC21
cg04564000	cg34177108_TC21
cg04619304	cg44134467_BC21
cg04703476	cg29861261_TC11
cg04728296	cg45768969_BC21
cg04737124	cg36540327_TC11
cg04800503	cg29979133_BC11
cg04850731	cg29148963_BC21
cg04860563	cg34032063_TC21
cg04887807	cg42056114_TC21
cg04904276	cg33911265_TC21
cg04932928	cg45304779_BC21
cg05036656	cg42244558_TC21
cg05046589	cg35378861_TC21
cg05121006	cg42491972_TC11
cg05146544	cg37426217_TC21
cg05156137	cg34501265_BC21
cg05160563	cg37937024_TC21
cg05169846	cg43915151_BC21
cg05207834	cg29947386_TC21
cg05226008	cg45591858_BC21
cg05301383	cg38513211_BC21
cg05345154	cg28727851_TC21
cg05347108	cg46143661_TC21
cg05365735	cg37018210_BC21
cg05389236	cg34800287_TC21
cg05457480	cg35597063_BC11
cg05500919	cg29686792_TC21
cg05555207	cg42708162_TC21
cg05603896	cg28404831_BC21
cg05607053	cg05607053_TC21
cg05616969	cg37392852_TC21
cg05633523	cg44652808_BC21
cg05861512	cg31046489_TC21
cg05915139	cg42771338_TC21
cg05928053	cg38603055_BC21
cg05973305	cg31858961_BC21
cg05979457	cg33269395_TC21
cg06071058	cg31562590_TC21
cg06145336	cg38559639_BC21
cg06189394	cg43728590_BC21
cg06206801	cg35460426_BC21
cg06240209	cg45190391_TC21
cg06274159	cg45628109_BC21
cg06325209	cg37761806_BC21
cg06369327	cg47083421_BC11
cg06372850	cg38462080_TC11
cg06433023	cg28401484_BC21
cg06456031	cg43299926_BC21
cg06556702	cg29143681_BC11
cg06591973	cg06591973_TC21
cg06679334	cg29862434_TC21
cg06692785	cg37638314_BC11
cg06747919	cg37210083_TC11
cg06806862	cg33996644_TC21
cg06835156	cg31117684_TC21
cg06846010	cg46021751_BC11
cg06864895	cg33749948_TC21
cg06899985	cg46877455_BC21
cg06919440	cg45953920_TC11
cg06933574	cg31642678_TC21
cg06976250	cg46727489_TC21
cg07067993	cg42815546_BC21
cg07105478	cg30268353_BC21
cg07109453	cg46364176_BC11
cg07196514	cg37795200_TC21
cg07216133	cg31450963_BC11
cg07220152	cg34884705_BC21
cg07406191	cg47083858_BC21
cg07569216	cg46965600_BC21
cg07617759	cg35211862_BC21
cg07619656	cg31299734_BC11
cg07719096	cg46218387_TC21
cg07747133	cg39633881_BC21
cg07823492	cg29979927_TC21
cg07834574	cg29722992_TC21
cg08041350	cg29808795_BC21
cg08079908	cg38558982_BC21
cg08116462	cg38773153_TC21
cg08129092	cg40018996_BC21
cg08135406	cg32226382_BC21
cg08136432	cg46310316_TC21
cg08201451	cg46161018_TC21
cg08334034	cg44718291_TC21
cg08384999	cg47462688_BC11
cg08460812	cg40336223_BC21
cg08462988	cg47084071_TC21
cg08467103	cg29298079_TC21
cg08470863	cg34362702_TC11
cg08499046	cg38773126_TC21
cg08538032	cg41279782_BC21
cg08582485	cg39086105_BC21
cg08618463	cg45883113_BC21
cg08640619	cg39978900_BC21
cg08655662	cg34989910_TC21
cg08690859	cg36955331_BC21
cg08718050	cg45299569_TC21
cg08810842	cg32646935_TC21
cg08822898	cg29047055_TC21
cg08844365	cg28363459_TC11
cg08855395	cg46342572_BC21
cg08872313	cg43748087_TC21
cg08894487	cg28710154_TC11
cg08956101	cg30561662_TC21
cg09019936	cg38451565_BC21
cg09027601	cg37996575_TC21
cg09048251	cg31920851_BC21
cg09052548	cg38031800_BC21
cg09093150	cg33081141_BC21
cg09131339	cg40170480_TC21
cg09187007	cg41772627_BC21
cg09233395	cg33324690_BC21
cg09349604	cg42244669_TC21
cg09398762	cg45348864_TC21
cg09451215	cg47039773_TC21
cg09500171	cg42250069_BC21
cg09522018	cg28218307_BC21
cg09581226	cg35617392_BC21
cg09590068	cg33839539_BC21
cg09599130	cg36458456_TC21
cg09625259	cg28868947_BC21
cg09626521	cg34179989_BC21
cg09645993	cg31920396_BC21
cg09646197	cg43387796_TC11
cg09647671	cg39290483_BC21
cg09670128	cg33820815_BC11
cg09760728	cg47637726_BC11
cg09782540	cg31476956_TC21
cg09784335	cg42244549_BC21
cg09851951	cg45999245_BC21
cg09864050	cg30535764_BC21
cg09884146	cg29298082_BC21
cg10105884	cg28269627_TC21
cg10146929	cg31348717_TC11
cg10264687	cg45972038_TC21
cg10374084	cg44507377_BC21
cg10377153	cg31561678_TC21
cg10397932	cg41787870_TC21
cg10414350	cg32591257_BC21
cg10423771	cg32349528_BC11
cg10426464	cg46902981_BC21
cg10539700	cg38603590_TC21
cg10606240	cg38776173_BC11
cg10611331	cg33421113_TC21
cg10622644	cg41663596_TC11
cg10692467	cg47229689_BC11
cg10705306	cg45509042_TC21
cg10713515	cg38108159_BC21
cg10732611	cg43079937_TC11
cg10737521	cg29508578_TC21
cg10774282	cg41260156_TC21
cg10790429	cg28774555_TC21
cg10824810	cg46005459_TC21
cg10837383	cg31467777_BC21
cg10862567	cg30305018_TC21
cg10864680	cg45357659_TC21
cg10902396	cg43445642_TC21
cg10928544	cg31024684_TC11
cg10932486	cg32037578_TC11
cg10942521	cg38451540_BC21
cg10991450	cg36702625_BC21
cg11049634	cg47463194_TC11
cg11066033	cg37254154_TC21
cg11071682	cg37981110_TC21
cg11113469	cg43114873_TC21
cg11128216	cg38773097_BC21
cg11159604	cg42542300_TC21
cg11172629	cg38031801_TC21
cg11192169	cg40607102_BC21
cg11209832	cg47083923_BC21
cg11282676	cg31348713_BC21
cg11323985	cg45788651_BC21
cg11333375	cg41786033_BC21
cg11452043	cg36791710_BC11
cg11505661	cg29148962_BC21
cg11511443	cg44081211_TC11
cg11621464	cg44348948_TC11
cg11642106	cg47340220_TC21
cg11731671	cg41779189_TC21
cg11775521	cg44912844_BC11
cg11864566	cg48014618_TC21
cg11868247	cg43126302_BC21
cg11891395	cg43115396_TC21
cg11903133	cg39313445_TC11
cg12052265	cg46400120_BC21
cg12145907	cg35617486_BC21
cg12152338	cg38739733_TC21
cg12280150	cg46450678_TC21
cg12458966	cg37876681_BC21
cg12522311	cg45929788_TC21
cg12523932	cg42223024_BC11
cg12615535	cg47136092_TC21
cg12630714	cg42305216_TC11
cg12642431	cg46829923_BC21
cg12648201	cg41991381_BC11
cg12707343	cg34662648_BC11
cg12728606	cg42036702_TC21
cg12732998	cg47083096_BC21
cg12736877	cg34895367_BC11
cg12835736	cg31405836_TC21
cg12883629	cg31355245_TC21
cg12921481	cg37797901_BC21
cg12924430	cg31156653_BC21
cg12966875	cg39243767_BC21
cg12989934	cg29391470_BC11
cg13039539	cg42852301_TC21
cg13068216	cg34590861_BC21
cg13081620	cg48114591_TC21
cg13120814	cg43299923_TC21
cg13158272	cg30895031_BC21
cg13161113	cg34588755_BC21
cg13213009	cg36684122_TC21
cg13294846	cg31791783_BC21
cg13305336	cg46328314_BC21
cg13353999	cg35497255_TC21
cg13374432	cg44735943_BC11
cg13381110	cg37315386_TC21
cg13449257	cg38183011_TC21
cg13466988	cg41663590_TC21
cg13493426	cg30653183_BC21
cg13507224	cg37793231_BC21
cg13522891	cg45418338_TC21
cg13549940	cg41744351_BC21
cg13683667	cg41708169_BC21
cg13706058	cg47060856_BC21
cg13707793	cg35595625_BC21
cg13710662	cg41936976_TC21
cg13711424	cg30820472_BC11
cg13728069	cg38150527_TC21
cg13732582	cg42223046_TC11
cg13744172	cg46005616_BC21
cg13815695	cg28793718_TC21
cg13832669	cg37388246_TC21
cg13962347	cg31436473_BC21
cg13997975	cg32256256_BC11
cg14029856	cg38643095_TC21
cg14057041	cg46697640_TC21
cg14171369	cg30906831_BC21
cg14196395	cg43631349_TC21
cg14197503	cg31239250_BC21
cg14252486	cg14252486_TC21
cg14258143	cg41459530_TC21
cg14263222	cg38188031_TC21
cg14275842	cg29722989_BC11
cg14276584	cg31726443_TC21
cg14298457	cg38559231_BC21
cg14321742	cg45176625_BC21
cg14448169	cg43203225_BC21
cg14485633	cg38177883_BC21
cg14530275	cg41085985_TC21
cg14547895	cg46608991_TC21
cg14582845	cg29686793_TC11
cg14839134	cg40589470_TC21
cg14989033	cg37942672_TC21
cg15016062	cg31820125_BC21
cg15038286	cg43672070_BC21
cg15122439	cg36956204_TC21
cg15197065	cg31906104_BC21
cg15261861	cg33836251_TC21
cg15288618	cg47136088_TC21
cg15316843	cg39521368_BC21
cg15324917	cg46340249_BC21
cg15374435	cg32885573_BC11
cg15393490	cg37993268_TC21
cg15442737	cg33471201_TC21
cg15442907	cg43906493_BC21
cg15444648	cg31824623_BC21
cg15454698	cg43703132_TC21
cg15484651	cg44806195_BC21
cg15571405	cg43269536_BC21
cg15579587	cg37225609_TC11
cg15586327	cg38809277_BC21
cg15597364	cg41560368_BC11
cg15607672	cg32455600_BC21
cg15609272	cg29454985_TC21
cg15633390	cg40395156_BC21
cg15645203	cg45230724_TC11
cg15648345	cg29896250_TC21
cg15648389	cg33840407_TC11
cg15676292	cg43344621_BC21
cg15689991	cg29088648_TC21
cg15724945	cg40090750_TC21
cg15726154	cg39849481_TC11
cg15759721	cg29882819_TC21
cg15818008	cg46736259_BC21
cg15843262	cg30317198_TC21
cg15872458	cg33843815_BC21
cg15899743	cg32493395_TC21
cg15916160	cg46005593_TC11
cg16005939	cg42540963_BC11
cg16080643	cg35896305_TC21
cg16170767	cg40676753_BC21
cg16172099	cg33259026_BC11
cg16277229	cg36706499_BC21
cg16293118	cg33008836_TC21
cg16326777	cg42453614_BC21
cg16342115	cg35497261_TC21
cg16435779	cg33247666_TC11
cg16490124	cg46369032_BC21
cg16567723	cg45398131_TC21
cg16675758	cg46706058_BC21
cg16747717	cg46203104_BC21
cg16772207	cg39438587_BC21
cg16805215	cg47151554_TC21
cg16809460	cg41277157_BC21
cg16878214	cg40608953_BC21
cg17133045	cg37818487_BC21
cg17139666	cg45727306_BC21
cg17153727	cg36696776_TC21
cg17202717	cg42946368_BC21
cg17221584	cg46949840_BC21
cg17274064	cg34540608_BC21
cg17334453	cg29648156_TC11
cg17378966	cg34760488_BC21
cg17441062	cg44828973_BC21
cg17449954	cg41379592_BC21
cg17454831	cg29289428_BC11
cg17596249	cg34580569_TC21
cg17634781	cg45647460_BC21
cg17759252	cg45810532_BC21
cg17771031	cg39256515_TC21
cg17829746	cg37952195_BC21
cg17896927	cg44718194_BC21
cg17964844	cg33779846_TC21
cg17982031	cg35615586_BC11
cg18002116	cg32733473_TC21
cg18031596	cg33287578_TC21
cg18090004	cg42941283_TC21
cg18158859	cg45344383_TC21
cg18165914	cg46724870_TC21
cg18166150	cg31236132_TC21
cg18207999	cg30011226_TC21
cg18302334	cg30863373_BC21
cg18352935	cg44937895_TC21
cg18361975	cg35093362_TC21
cg18403361	cg30690717_BC21
cg18428265	cg36837286_TC21
cg18456803	cg32730915_TC21
cg18486235	cg42542138_BC21
cg18556792	cg35289744_TC21
cg18571412	cg39599071_BC21
cg18662228	cg37211591_BC21
cg18672030	cg42207455_TC21
cg18675097	cg31331223_BC21
cg18720151	cg44081240_BC21
cg18721307	cg35941912_TC21
cg18735956	cg34775633_BC11
cg18780288	cg36514101_TC21
cg18787420	cg39122895_BC21
cg18825531	cg36135009_TC21
cg18848446	cg32471457_TC11
cg18862481	cg43708504_BC21
cg18898125	cg32631478_TC21
cg18947951	cg29314226_BC21
cg19047660	cg29979802_BC21
cg19047868	cg29978669_BC21
cg19149132	cg45223735_TC21
cg19196826	cg42959165_BC21
cg19240678	cg46545974_BC21
cg19271111	cg47082937_TC21
cg19280586	cg46855450_TC21
cg19287349	cg46895892_BC21
cg19457763	cg46630384_BC21
cg19547972	cg42881666_TC21
cg19589939	cg28800046_BC21
cg19689368	cg43304886_TC21
cg19709468	cg39076991_TC11
cg19758859	cg28155168_TC21
cg19759671	cg45685020_TC11
cg19764594	cg43863585_TC21
cg19788250	cg34430830_BC21
cg19836199	cg34507519_TC21
cg19901381	cg42012440_TC21
cg19922825	cg35305453_TC21
cg19924619	cg37742708_TC21
cg19936812	cg32076989_TC21
cg19987768	cg29776425_BC11
cg19999682	cg42088399_BC21
cg20141398	cg41780144_TC21
cg20162206	cg35497263_BC21
cg20215112	cg30072131_BC21
cg20270653	cg42846288_TC11
cg20278269	cg36068760_TC11
cg20307292	cg36814758_TC11
cg20368124	cg44763283_BC21
cg20431191	cg40448943_TC21
cg20480274	cg29794445_BC21
cg20539142	cg45517279_TC21
cg20546778	cg36686832_BC11
cg20574490	cg33247678_BC21
cg20582941	cg47278963_BC21
cg20591120	cg41996033_TC21
cg20648827	cg47899741_BC21
cg20665157	cg43210814_BC21
cg20738500	cg44762778_BC21
cg20780105	cg32043599_TC21
cg20784768	cg46360178_BC21
cg20994660	cg38451227_BC11
cg21040133	cg42959821_TC21
cg21071097	cg29722997_TC21
cg21082400	cg31962311_TC21
cg21123686	cg32017032_BC21
cg21160099	cg40670013_BC21
cg21232620	cg47016406_BC21
cg21251140	cg38597029_TC21
cg21262776	cg41777075_BC21
cg21313729	cg44808067_BC21
cg21366602	cg41272603_BC21
cg21422605	cg40457345_BC21
cg21427119	cg39121109_TC21
cg21457147	cg32694389_BC21
cg21475097	cg41776826_TC21
cg21497990	cg41964123_TC21
cg21538208	cg42057044_TC11
cg21552242	cg39849383_BC21
cg21627409	cg35616800_BC21
cg21672992	cg44740076_TC21
cg21766898	cg36696818_TC21
cg21802055	cg42056927_BC21
cg21805940	cg33005009_TC21
cg21843616	cg42492620_BC21
cg21871080	cg30161033_BC11
cg21907579	cg42708237_BC11
cg21970929	cg33056852_TC21
cg21974358	cg33813974_BC21
cg21992400	cg45025730_TC21
cg22081832	cg43713942_TC11
cg22118524	cg37925313_BC21
cg22154659	cg43425034_TC21
cg22262702	cg39417339_TC21
cg22276811	cg45788655_BC21
cg22350070	cg43589379_BC11
cg22462983	cg28270952_TC21
cg22507154	cg42540769_BC11
cg22559034	cg31824541_BC21
cg22590902	cg44744580_TC21
cg22614239	cg47083828_TC11
cg22620414	cg43863579_TC21
cg22736807	cg31823877_BC21
cg22796355	cg30099968_BC21
cg22840361	cg44695763_BC11
cg22871253	cg34597712_BC21
cg22893791	cg41977320_TC21
cg23080060	cg32037576_BC21
cg23082387	cg41733949_BC21
cg23139982	cg42058026_TC21
cg23165310	cg39633786_BC11
cg23201812	cg38749230_TC21
cg23256675	cg35570981_TC11
cg23261343	cg34943058_BC21
cg23267558	cg32814991_BC11
cg23288838	cg32637479_BC21
cg23336143	cg35231992_TC21
cg23365739	cg32455598_TC21
cg23424933	cg35306852_TC21
cg23444265	cg44527728_BC21
cg23480730	cg30647403_TC11
cg23497016	cg29289444_BC11
cg23497569	cg30533847_TC21
cg23503775	cg28404830_TC21
cg23532454	cg30912129_BC21
cg23627301	cg30641661_BC21
cg23651872	cg30270982_TC21
cg23680067	cg31310734_TC21
cg23680451	cg31231432_TC21
cg23689428	cg37375693_BC11
cg23734137	cg44696380_BC21
cg23800435	cg41341999_BC21
cg23900293	cg46702721_TC11
cg23918490	cg35390135_TC21
cg23947376	cg35404105_TC21
cg23958704	cg33259037_BC21
cg23966017	cg32264247_TC21
cg23967544	cg34764796_TC11
cg23983453	cg31824035_TC21
cg24121069	cg45398135_TC11
cg24149658	cg48076537_BC21
cg24154325	cg30619267_BC21
cg24158307	cg31058762_BC21
cg24174145	cg33820295_BC11
cg24286174	cg34027559_BC21
cg24409539	cg38144936_TC11
cg24437715	cg37213541_TC21
cg24630825	cg45714769_BC21
cg24631428	cg36763130_TC21
cg24638356	cg43705399_BC21
cg24642523	cg30820303_BC21
cg24675673	cg44164765_BC21
cg24683185	cg44639740_TC21
cg24685006	cg41423657_TC21
cg24700222	cg40445334_TC11
cg24722950	cg30796956_BC21
cg24725789	cg36590664_TC21
cg24740868	cg41160169_TC21
cg24780501	cg45292046_BC21
cg24799830	cg31323524_BC21
cg24835159	cg29893618_TC21
cg24889708	cg29978340_BC21
cg24930059	cg30180232_BC21
cg24947764	cg42244694_BC21
cg24977462	cg46883187_TC21
cg25005357	cg46942426_TC21
cg25033364	cg44535539_TC21
cg25093813	cg35305500_TC21
cg25198340	cg32297341_BC21
cg25227672	cg46610760_TC21
cg25233139	cg45380489_BC21
cg25296103	cg38337655_BC21
cg25300386	cg43093507_TC21
cg25363445	cg38696530_BC11
cg25426743	cg43425798_TC21
cg25443851	cg31853483_TC21
cg25503149	cg29734041_BC21
cg25570913	cg45386101_BC21
cg25593948	cg36696369_TC11
cg25640519	cg47117021_TC21
cg25764105	cg38773295_BC21
cg25859972	cg43713944_TC21
cg26004759	cg45909708_TC21
cg26097391	cg29361725_BC21
cg26123605	cg47082903_TC21
cg26227005	cg41279781_TC21
cg26230145	cg41608061_TC21
cg26361533	cg43909685_TC11
cg26382551	cg38031803_BC21
cg26429499	cg45299566_BC21
cg26446133	cg36034660_BC21
cg26521186	cg37820974_BC21
cg26577017	cg39466871_BC21
cg26626251	cg46543823_TC21
cg26662049	cg44762301_TC21
cg26690511	cg39829449_TC21
cg26874634	cg29948575_TC11
cg26986629	cg35242023_TC21
cg27016494	cg43115377_TC11
cg27028281	cg40296385_BC21
cg27088725	cg46143673_BC21
cg27092857	cg31853485_BC11
cg27137389	cg45219599_TC21
cg27234864	cg32530605_BC11
cg27236629	cg44695968_TC21
cg27300028	cg32999002_BC21
cg27326113	cg40636956_TC21
cg27353361	cg28404839_BC21
cg27376136	cg28541936_TC11
cg27423627	cg43748135_BC21
cg27428708	cg46004207_TC21
cg27448433	cg43437880_BC21
cg27553162	cg39125688_TC21
cg27664496	cg42720790_TC21

## Sheet: ST3_Distance_Human_Mouse
	PlexusCarcinoma_hGFAP_cre_P53Fl_Fl_lsl_MYCNFl_wt_CAG_Gli2	PlexusCarcinoma_Lmax1a_cre_P53f_f_Rbf_f	Brainstem_Wildtype_P0	Brainstem_Wildtype_P14	Brainstem_Wildtype_P21	Brainstem_Wildtype_P28	Brainstem_Wildtype_P7	Cerebellum_CtrlCBE16	Cerebellum_Wildtype_P0	Cerebellum_Wildtype_P14	Cerebellum_Wildtype_P21	Cerebellum_Wildtype_P28	Cerebellum_Wildtype_P7	Cerebralcortex_Wildtype_P0	Cerebralcortex_Wildtype_P14	Cerebralcortex_Wildtype_P21	Cerebralcortex_Wildtype_P28	Cerebralcortex_Wildtype_P7	Thalamus_Wildtype_P0	Thalamus_Wildtype_P14	Thalamus_Wildtype_P21	Thalamus_Wildtype_P28	Thalamus_Wildtype_P7	MuscleControl_Wildtype_adult	MB_Gr_3_Cmyc+Brg1	MB_Gr_3_cMyctransplantedcerebellarcells	MB_Gr_3_Glt1_tTA_TRE_MYCN_Luc	MB_Gr_3_Gr3__MYCNSchulte	MB_Gr_3_LRL_Myc_Trp53DN_Atoh1_Cre	MB_Gr_3_LRL_Myc_Trp53DN_Gad2_IRES_Cre	MB_Gr_3_LRL_Myc_Trp53DN_Ptf1a_Cre	MB_Gr_4_p53DN_srcCA	MB_SHH_Elp1cKO_Ptch1	MB_SHH_Elp1WT_Ptch1	MB_SHH_Math1_Cre_Gli2A	MB_SHH_Math1_cre_Ptch1Fl_Fl	MB_SHH_Math1_cre_SmoM2	MB_SHH_Math1_CreERT_Gli2A	MB_SHH_Ptch1_BcorKO	MB_SHH_Ptch1_Elp1KO	MB_SHH_Ptch1(+_d)_Bcor(p_p)_Atoh_Cre	MB_SHH_Ptch1	MB_SHH_Ptch1KO_Trp53KO	MB_SHH_Ptch1KO	MB_SHH_SHH_Ptch1+___Atoh1_EGFP	MB_SHH_SHH	MB_WNT_Blbp_cre_Ctnnb1Fl_Fl_TP53Fl_Fl	ATRT_MYC_R26_Myc	ATRT_MYC_Rosa26_creERT2_Smarcb1
CONTR ADENOPIT	16.4976	20.1823	19.0337	16.6218	16.2303	15.9327	19.9572	17.7798	18.6302	16.9794	15.238	16.8167	17.9056	19.1455	17.9158	15.2863	16.0556	15.0002	19.2622	17.6499	16.3963	15.3768	17.64	14.7482	19.0446	16.0716	19.9603	21.9033	21.3976	14.5029	15.099	16.4008	15.8243	17.5489	15.0905	18.045	16.6822	15.8996	19.419	15.9744	17.3628	16.5729	15.3582	16.0439	14.8493	16.1702	15.2242	13.5204	16.6941
CONTR CEBM	2.55298	18.1725	12.0187	6.06158	2.2016	2.25373	10.4771	10.5076	12.3297	0.0879392	0.030957	0.0352882	2.3888	9.4328	5.52472	2.20887	1.72199	2.7344	11.6225	5.93444	4.48335	2.32878	10.7392	4.4145	11.8839	4.26915	13.5484	17.6445	11.4078	2.23874	1.48553	2.62042	4.15454	2.03379	3.87242	2.50945	3.24154	2.82598	1.85089	1.28183	0.395391	1.81081	2.25101	1.88157	2.10689	2.20395	0.683714	4.63087	7.01605
CONTR HEMI	4.44128	18.1893	11.7353	5.10364	0.354258	0.381434	10.5219	10.627	12.4253	3.1055	2.69601	3.00989	4.73195	9.27233	4.5476	0.280984	0.24191	1.24041	11.8585	4.91465	3.01703	0.378168	10.531	4.24657	12.545	6.29437	14.0091	17.7513	11.9614	5.13576	3.47639	2.73433	6.06506	4.36039	5.96337	4.67077	5.46762	4.78424	4.66363	4.0207	3.97783	4.67247	4.55572	4.65735	4.76935	4.56781	0.944541	4.5023	6.58195
CONTR HYPTHAL	9.56307	17.0734	12.6458	10.1369	7.5037	7.0112	11.8816	11.8412	14.802	8.73246	8.03659	8.20168	8.7471	10.7452	10.4699	8.20265	8.3147	8.79042	13.5217	10.32	9.00622	7.14785	13.7575	9.10914	15.9529	8.36532	16.245	18.4294	12.4402	7.43146	9.20286	8.56489	10.5019	9.01331	8.55665	8.25305	9.64943	8.91006	7.30918	8.01372	8.75395	8.56969	8.66239	8.57394	9.10655	8.95916	8.59609	8.95041	9.80006
CONTR INFLAM	6.37236	18.2552	11.3547	7.19997	4.46246	4.41188	10.6789	9.51496	11.9541	5.61455	5.3348	5.23907	6.70759	9.76786	6.91657	4.5308	4.3664	4.97099	11.9822	6.18304	5.81927	4.29758	9.83431	1.9174	11.8407	8.40861	15.9787	18.0425	11.8957	6.27377	4.21199	2.60161	7.67827	6.64806	7.10825	6.43367	6.81252	5.43458	5.9877	6.26553	5.65303	6.41108	6.66093	6.63389	6.25303	6.47595	4.51382	1.46907	4.57514
CONTR PINEAL	19.1931	0.615433	12.7203	18.1189	19.2593	18.126	17.4053	25.4155	14.8963	18.8833	18.0855	17.1753	17.6483	15.7793	18.0523	18.1551	17.038	17.3966	8.977	18.4212	18.5722	18.2745	19.4718	18.6539	14.5793	20.892	2.83147	1.96172	18.1171	19.3065	19.6304	19.2828	16.0816	19.2622	18.1217	18.993	26.1558	17.8453	23.0435	18.6635	17.6624	18.6054	17.5859	18.0586	18.602	18.6377	18.8521	18.748	17.8846
CONTR PONS	10.2086	20.47	13.4298	11.5924	9.10067	9.61799	12.8852	13.1569	16.4673	10.3254	10.3313	9.04936	10.9106	12.67	11.3514	9.87818	9.90435	10.7815	14.5542	11.0249	11.2032	9.6985	13.5669	10.429	14.4415	10.77	17.2266	17.6615	12.7925	10.8875	10.2537	9.70845	12.0599	10.7435	10.755	8.78145	9.85958	11.1148	8.09533	11.0537	10.088	10.4223	11.3567	10.7035	10.6419	10.579	10.4664	10.0207	11.7205
CONTR REACT	5.71485	18.136	11.4877	6.57294	3.47615	3.42863	10.3314	9.41958	11.8927	4.87431	4.48868	4.39196	6.15407	9.49509	6.02335	3.59412	3.48528	4.12201	11.5351	5.90502	5.08572	3.38238	9.88149	1.24477	11.4676	7.6894	15.3426	17.6767	11.7843	6.17308	3.19408	1.34129	6.96091	6.06434	6.52469	5.98921	6.50903	4.90647	5.92832	5.53087	5.35149	5.92947	6.10766	6.06793	5.9073	5.90369	3.53974	1.05503	3.92703
CONTR WM	9.46541	19.3404	14.7148	10.4319	8.56728	8.54219	12.8994	12.5973	13.1653	8.57941	7.71848	9.2066	9.08207	11.8244	9.58357	8.65231	8.73145	8.94597	14.9459	10.4989	9.53786	8.43278	14.09	8.51189	13.2878	8.97987	15.8617	19.5998	13.8127	10.6788	9.37586	8.94006	9.68041	8.9151	10.4714	8.10394	9.27569	8.787	8.74506	9.34979	9.92112	9.59886	8.85956	9.52422	9.38255	9.27279	7.93154	8.09985	10.2217
ATRT MYC	10.8355	20.308	3.27562	6.80574	11.2391	10.1994	4.58543	5.29187	2.88466	12.8639	11.8257	11.8304	12.0177	3.31504	8.98508	10.7158	10.236	9.52527	1.39226	7.35937	9.52545	11.2386	3.80014	10.0591	1.70253	13.2961	17.0762	19.5681	5.96589	10.8342	10.3986	10.565	13.4397	12.5508	13.0025	12.7501	12.1948	11.7402	12.2005	11.9824	10.9496	11.9916	11.7327	12.2174	11.1717	11.786	11.4869	10.9556	7.78764
ATRT SHH	10.4278	19.5088	0.580717	4.17997	10.7388	9.94142	1.02723	1.00884	0.914941	12.1758	11.1936	11.5257	12.2044	1.16716	5.54574	10.096	9.40728	8.34468	0.474637	5.46923	7.64206	10.0769	0.922889	9.75425	0.492904	13.341	16.9298	19.2086	4.25494	11.2457	9.99244	10.5938	12.7129	12.4124	12.3629	12.416	12.1897	11.6035	11.7876	11.5998	11.1664	11.2839	10.7419	11.2419	10.9791	11.4604	11.7708	10.1992	7.12511
ATRT TYR	10.4434	19.841	0.137723	3.85051	11.0416	10.0718	0.122285	0.110565	0.107476	12.424	11.9042	11.8138	12.3729	0.691423	5.1084	10.6059	9.76017	8.44463	0.116342	5.25493	7.19494	10.5757	0.0988936	10.1536	0.0983014	13.5021	17.798	19.7089	3.64174	12.0756	10.6681	10.7832	12.7938	12.7307	12.4056	12.7691	12.5188	11.9964	11.9273	11.7595	11.4097	11.7066	11.1661	11.7582	11.2553	11.7163	11.8574	10.547	6.98862
CNS NB FOXR2	12.1408	20.5434	14.4262	11.4653	9.74547	11.3328	13.0043	12.5169	13.7442	10.7126	11.7033	11.0005	10.6121	12.2826	12.3613	10.2566	10.0207	11.1001	15.7605	10.7113	11.6609	10.7441	13.3091	12.3066	13.1931	10.0186	17.1231	19.4656	13.555	11.1297	9.16484	10.6459	10.7288	10.2418	10.525	10.5358	10.6171	10.7969	11.0477	10.8568	10.7315	10.9755	11.5114	10.908	10.8105	10.8493	11.4253	11.0415	12.086
ETMR	13.3264	20.4074	9.39713	13.7879	14.5746	13.882	11.8077	10.9004	9.46974	14.1393	14.8372	15.4224	14.6076	10.059	13.5257	13.5872	12.6093	13.1619	9.08043	13.0061	12.9031	13.5581	11.0594	14.0142	6.54792	16.782	17.9696	18.8563	10.9028	15.2154	14.0903	13.9118	16.122	15.6843	13.9476	16.3993	16.685	14.2312	14.2639	13.1313	13.9341	14.1146	14.3307	14.5875	12.9924	14.0996	13.999	13.9751	11.929
HGNET BCOR	10.4788	17.0401	13.7545	12.1351	10.0849	10.2397	13.9426	15.567	14.9273	9.76961	9.44293	9.56483	8.75164	13.5092	11.0494	9.49004	10.0754	10.8958	13.8044	11.6225	11.4764	9.80523	14.7795	10.7686	17.3666	9.42024	12.3093	16.9392	12.4348	9.76325	10.5393	10.3894	10.9561	9.3082	8.48494	9.31451	9.22535	10.4343	9.2563	9.3047	10.8375	9.82938	9.40611	9.62554	10.4431	10.3272	10.4008	11.2136	13.3837
MB G3	15.3758	12.2371	14.8648	15.8975	16.3093	16.1846	16.8259	21.7925	15.673	16.5094	15.5736	15.319	16.5006	15.7977	17.6046	15.1649	15.4533	15.87	14.0887	17.2392	16.2879	15.3045	19.9086	17.2481	16.8086	11.491	10.2293	12.9242	20.2346	13.9138	15.9189	17.1155	16.6113	15.3065	14.6232	15.4628	20.1765	15.8291	16.4326	15.8531	13.6156	14.9653	13.9411	14.6585	14.9707	15.3288	15.6894	17.0312	18.6978
MB G4	15.4187	12.2243	14.8765	15.9491	16.2836	16.1762	16.8915	21.8539	15.7812	16.6482	15.5965	15.3155	16.5966	15.8512	17.6774	15.1757	15.4641	15.8252	14.0741	17.3767	16.2012	15.3646	19.8854	17.3008	16.9137	11.5506	10.368	12.8812	20.2557	13.8451	15.862	17.1013	16.6839	15.3211	14.5844	15.5928	20.3762	15.955	16.459	15.7973	13.6617	15.0093	13.9476	14.6921	14.9448	15.3661	15.6402	17.0723	18.6246
MB SHH CHL AD	10.4588	18.9932	12.9985	10.9771	9.02473	9.54109	12.9805	14.5841	13.7783	8.72905	7.86172	8.22666	7.30538	12.7935	10.3998	9.76975	8.72703	10.1057	14.9615	11.1408	10.0493	9.74549	14.2788	10.9089	14.1871	6.65421	14.1711	17.6195	14.1347	7.12953	9.32845	8.99859	7.6414	8.20152	6.18227	7.10794	8.1647	8.70628	7.22541	7.37492	7.54374	8.14185	9.26	8.95957	8.17736	8.20134	9.20708	10.5364	11.5607
MB SHH INF	4.45069	18.4913	12.1629	8.60119	5.66971	5.75394	10.8906	12.376	12.6101	1.60632	2.19572	2.12156	0.593714	10.6879	7.38361	5.76705	5.15627	6.41624	12.2333	7.83314	7.2141	5.74289	12.2741	7.04829	12.4092	0.397829	14.1873	16.8331	11.2049	0.457302	3.60223	5.47116	0.411088	0.845728	0.374645	1.03311	0.503299	2.5619	0.509329	0.651936	0.888308	0.710144	0.834516	0.84226	0.495769	0.656643	5.32829	7.29648	8.55154
MB WNT	12.5363	14.1608	13.4556	13.277	13.269	12.8773	14.1465	18.8015	14.1054	12.5664	11.9585	12.0451	11.5713	13.8427	13.5363	12.4492	12.0763	12.735	11.6851	12.943	13.9747	12.4147	16.287	13.7128	18.3642	11.6986	11.6346	13.1341	17.0311	11.2724	11.33	13.6186	13.5101	12.4538	12.9235	12.7859	13.0447	11.6054	11.4875	13.9134	12.0015	11.9041	10.5752	10.85	12.2478	12.0184	13.3035	13.9359	16.5363
EPN MPE	11.5131	18.9428	13.5311	10.9059	10.648	11.0584	12.4855	12.586	12.5909	11.2178	10.4975	11.631	12.0566	13.912	11.3467	11.2667	10.4206	10.7447	12.3066	11.8179	10.9652	10.9259	13.9937	10.8136	12.5785	13.6556	19.0045	19.4516	8.84886	11.095	10.0739	10.6565	11.4572	12.6517	11.2327	11.4968	12.3455	11.5446	11.4269	10.8745	10.3486	11.2182	10.4604	11.3587	12.1335	11.8006	11.3587	10.8289	10.6708
EPN PF A	9.67613	17.7526	14.0767	11.1825	9.16142	9.67403	12.8866	14.0865	12.8906	8.71188	8.53456	8.79443	9.18083	11.8279	11.8052	9.39911	9.26506	9.42411	13.3645	9.81375	10.5635	8.8261	13.7414	10.6151	13.3805	9.55531	14.7758	17.0456	11.9493	9.43588	8.6113	9.51517	10.5651	8.6457	10.0149	8.81999	9.4899	9.86802	8.12346	8.13568	8.7885	8.82061	8.40028	8.90037	9.1714	9.30284	10.5112	11.0621	11.8811
EPN PF B	9.05853	15.8062	10.1168	10.6052	10.1021	9.38907	11.3447	14.3988	12.0694	9.25083	8.72219	10.1803	8.42325	10.522	10.1907	9.17061	8.97749	10.1991	12.4558	10.5727	10.6999	10.0494	13.3111	10.8924	14.0674	10.2296	14.6793	17.6197	9.48831	8.25163	9.63473	10.581	11.0529	9.38634	9.8865	9.64596	9.58269	9.42316	8.58607	9.4314	9.33935	9.48372	8.5664	9.55068	8.97903	9.25606	10.0043	11.0291	10.2644
EPN RELA	8.75138	15.6865	11.199	10.1275	7.62268	8.50051	11.9358	15.469	12.2484	7.62213	7.297	7.98459	7.36557	11.3454	9.46211	7.53801	7.54266	8.37143	11.7716	8.97541	9.28454	7.7455	13.6054	9.33534	14.7676	6.84785	12.244	14.6868	12.0374	8.65216	7.80371	8.38843	9.21031	8.56831	7.32595	7.57946	8.60314	8.72588	7.26082	8.12279	7.19413	7.77995	7.26726	8.00996	8.33176	8.25183	7.10184	9.97974	11.3659
EPN SPINE	11.5905	18.4579	12.8674	12.1768	11.6247	11.288	13.5225	12.6731	14.1832	11.2804	10.6773	11.5465	11.0013	11.973	11.9154	10.7728	11.3977	10.9012	15.3225	11.8198	11.605	11.7551	13.4924	11.8212	11.9225	13.4716	15.5933	19.5397	11.9257	8.90126	10.94	11.2059	12.0913	11.7989	11.6227	13.2419	11.6921	12.1891	12.4319	11.0734	10.7419	11.7461	10.9208	11.6188	11.1332	11.2931	11.0924	11.3009	11.257
EPN YAP	33.2308	26.5043	30.4269	30.2844	31.9346	31.7632	32.1284	51.1809	31.1859	32.522	31.2003	30.5143	30.2555	29.4079	32.0383	30.2505	28.3308	32.0213	30.642	33.0709	29.5329	31.2023	32.2013	29.957	28.5799	32.2417	21.0899	22.997	30.286	31.0136	29.555	31.9547	29.2842	31.7995	30.9823	32.173	56.8151	29.9011	28.5963	33.2468	29.2953	30.1276	27.9612	30.4154	30.2637	30.9247	30.1664	30.8992	35.6963
SUBEPN PF	9.80245	16.0727	10.7623	11.3638	11.342	10.5496	11.3135	14.7885	12.789	10.2601	9.61539	11.19	9.59693	11.292	11.2959	10.2282	9.65465	11.0461	13.0351	11.5672	11.6757	11.1568	14.2086	11.8804	15.1536	11.4679	15.3122	18.2981	9.7483	9.10546	10.4765	11.6714	12.063	10.1351	11.0131	10.2342	10.8301	10.3963	9.32763	10.3694	10.2611	10.3492	9.15347	10.3479	9.9408	10.1357	10.5694	11.7891	10.7436
SUBEPN SPINE	6.41629	17.3741	11.8832	8.43842	5.76062	5.83773	10.5644	11.5405	12.2485	6.2798	5.36163	5.45372	5.69999	10.2015	8.09181	5.69763	6.37776	6.71271	11.7533	7.62586	7.91835	5.88597	11.978	7.12465	12.89	6.55167	14.3508	16.663	11.1434	5.86341	5.64705	5.86254	8.11311	5.42899	5.45188	5.27401	6.8648	6.63946	4.68724	4.86108	5.62369	5.44175	4.77446	5.46082	5.80854	5.77639	5.12666	6.94295	9.08241
SUBEPN ST	12.9855	17.2654	13.3617	11.3427	12.5605	11.9084	12.2067	16.0741	13.2969	11.2939	12.011	12.0163	11.3253	13.8565	12.2344	11.4715	11.5418	12.3924	13.8396	12.8845	12.7428	11.3364	15.2652	13.4563	14.7277	12.484	17.7452	18.0836	11.6473	11.6687	12.127	12.5772	13.1778	12.1359	12.1768	12.5084	12.3235	12.6601	11.7942	10.9717	11.8163	11.6048	11.5732	11.9956	11.4301	11.711	13.09	12.8767	13.1723
CN	13.3779	17.6064	13.9645	13.7934	13.7611	13.6551	13.7161	14.8872	13.8869	13.2297	12.2261	13.7407	12.36	13.3338	14.1583	12.585	13.7263	14.2771	15.4838	14.5107	13.9442	13.4935	15.9625	15.3444	14.4045	13.4147	16.872	17.4185	10.566	14.2086	13.4218	13.9063	13.7227	13.3736	13.0278	13.1325	12.8812	13.6921	12.581	12.6991	12.4827	12.5456	11.2696	12.3676	12.9912	13.3585	14.5021	14.8669	14.0418
DLGNT	4.44743	18.5025	11.3911	6.23934	2.09402	2.29656	10.4234	9.89514	12.0318	3.4208	3.05461	3.06118	4.54493	9.26994	5.74084	2.20057	2.14741	3.16231	11.7733	5.57122	4.29896	2.24767	10.7373	3.65039	11.8761	5.96164	14.5108	17.3537	11.5824	4.6149	3.27765	2.49205	5.92921	4.45095	5.06659	4.60303	5.3524	4.41549	4.17318	3.73032	3.70312	4.45858	4.63377	4.70007	4.67862	4.49349	2.01157	3.90043	6.15731
ENB A	16.7133	16.8634	18.3339	17.5319	18.9046	18.4559	19.4999	24.5086	18.4249	17.6014	18.6121	17.5552	18.6538	18.2873	20.2802	17.325	17.7209	17.7267	16.4525	19.0327	18.1366	18.3419	21.7574	18.7826	20.4121	14.9513	13.4052	18.9318	20.9661	18.1074	18.7592	19.1603	19.3251	17.9214	18.9702	17.3337	22.736	16.9219	17.6061	17.071	14.9968	16.7541	16.7715	16.9656	17.0225	17.6696	17.2113	18.8734	20.3531
ENB B	16.7279	16.885	18.3873	17.5617	18.9199	18.4502	19.5172	24.5041	18.4521	17.6312	18.5624	17.5556	18.6456	18.2907	20.2746	17.363	17.7081	17.7184	16.4641	19.0457	18.1659	18.3772	21.7994	18.7922	20.3723	14.9829	13.4247	18.9611	21.0601	18.1885	18.7454	19.1623	19.3022	17.9679	19.034	17.3147	22.7633	16.9269	17.5732	17.0452	14.9905	16.7448	16.7502	16.9748	17.0072	17.6519	17.2534	18.8455	20.3963
LGG DIG DIA	6.04552	18.1599	11.772	6.9105	4.01197	3.97704	10.3479	9.15376	11.946	5.38523	4.74415	4.65643	6.55952	9.72119	6.17146	4.22747	3.98979	4.55194	11.4954	6.13575	5.38027	3.83059	9.98983	0.0990276	11.1184	7.81054	15.3199	17.6973	11.9247	6.68579	3.58609	1.95857	7.08414	6.18737	6.42416	6.30574	6.9301	4.74359	6.45769	5.91864	5.6833	6.26899	6.45039	6.32899	6.18919	6.22579	3.96899	0.371404	3.7241
LGG DNT	4.42301	18.2369	11.6358	5.46584	1.0067	1.07355	10.4822	10.3899	12.2567	3.07473	2.62903	2.85697	4.62207	9.29908	4.90242	1.00898	1.01845	1.92418	11.7766	5.07984	3.47302	1.06955	10.5578	3.77424	12.3208	6.27642	14.2459	17.4475	11.906	5.22755	3.09913	2.47802	6.04903	4.44157	5.75986	4.62937	5.31816	4.61673	4.51888	3.75311	3.90224	4.53525	4.53678	4.59031	4.74155	4.53986	1.1527	3.98463	6.154
LGG GG	4.34955	18.1204	11.4996	5.06853	0.673717	0.601285	10.4217	10.5633	12.4336	3.02173	2.63865	2.95381	4.72664	9.31944	4.83732	0.781088	0.704563	1.55479	11.7267	4.76186	3.00901	0.490093	10.426	4.13611	12.498	6.26358	14.1515	17.9296	11.7316	5.07164	3.62457	2.54999	6.18385	4.22437	5.77999	4.4638	5.34749	4.66131	4.57585	4.32456	3.87064	4.68107	4.52718	4.66049	4.7609	4.63015	1.2041	4.23278	6.21834
LGG RGNT	4.61441	18.2206	11.6244	5.70257	1.48869	1.52849	10.5244	10.3695	12.2053	3.24397	2.72106	2.95144	4.63258	9.35724	5.15239	1.46426	1.48996	2.32441	11.7587	5.34654	3.84631	1.52967	10.6181	3.68247	12.278	6.31922	14.3975	17.261	11.9844	5.35644	3.03422	2.5346	6.14637	4.51331	5.74101	4.66542	5.32746	4.66952	4.65119	3.73695	3.98739	4.56422	4.57764	4.60943	4.78626	4.60475	1.46877	3.82245	6.10844
LIPN	25.6985	29.0096	23.9412	27.2002	26.7427	28.4359	29.7985	25.9157	21.8487	31.689	24.85	26.6158	37.9649	26.4846	33.0649	28.7801	23.7271	25.9444	24.4206	34.0384	27.1695	29.5156	25.5464	29.4666	21.3897	22.2512	23.1532	29.1619	42.53	18.5805	27.8996	37.9959	27.6307	25.0607	27.5377	32.9251	28.7956	27.9059	33.0019	21.2908	19.1308	27.1104	34.7147	33.3353	20.8958	24.3106	24.8291	24.7189	27.6194
PGG nC	24.267	27.2706	24.9335	24.9041	26.3072	25.6026	26.9727	24.2966	23.8869	24.0189	24.5587	25.5395	25.1429	24.2598	26.0891	23.0062	22.61	24.9164	26.8464	24.2218	24.1709	24.4142	23.633	25.9573	23.3904	24.9193	24.2488	23.8289	25.235	24.1962	25.5914	25.2065	25.8862	25.4334	25.7829	24.4454	24.9526	23.7822	26.0444	25.3446	23.0236	24.1994	23.1824	24.1876	24.1393	24.2542	23.7294	23.4726	27.0542
RETB	18.8641	4.40011	12.4614	18.0284	19.414	17.9031	17.191	25.2575	13.5523	19.1744	18.0046	17.6984	17.3166	15.5725	18.089	17.8047	17.1847	18.5715	7.96349	19.8449	18.6323	17.8076	20.3196	18.4359	14.5862	19.6669	1.69525	3.84063	19.0636	20.1157	18.9152	19.2039	16.0499	18.561	17.5759	19.1623	26.4465	18.0681	21.5246	18.1333	16.5529	17.937	16.738	17.7023	18.0282	18.3649	18.1777	18.5496	18.4962
DMG K27	4.46954	18.7366	11.3567	6.98672	3.43789	3.51096	10.6232	10.3788	12.3257	3.89384	3.38338	3.49696	4.37339	9.65449	6.52857	3.56	3.44327	4.1883	11.7532	6.11542	5.19786	3.61808	11.556	4.63183	12.3561	5.59396	14.3598	17.1374	11.4174	4.30037	4.10021	3.5403	6.20457	4.4948	4.62581	4.73425	5.29888	4.59117	3.88269	3.71603	3.60167	4.25211	4.43252	4.49367	4.52375	4.52948	2.9494	4.7424	6.84894
GBM G34	5.69731	19.3821	11.2705	8.42154	5.63318	5.48595	11.3189	10.8975	12.1505	5.53179	5.07552	5.17794	5.46942	10.2411	7.97332	5.65368	5.54233	6.21439	12.1246	7.75351	6.82674	5.54778	12.693	6.21721	12.9016	6.2724	14.9146	16.5408	11.6189	5.62542	5.63396	5.42692	7.57557	5.18205	4.98859	5.20542	6.0064	5.82449	4.55966	4.88704	4.74401	5.23507	5.65394	5.60661	5.63226	5.5237	5.20706	6.28982	8.16601
GBM MES	5.43681	18.6425	11.1938	6.89378	3.75484	3.59369	10.5815	9.81223	12.0596	4.60768	4.25801	4.14885	5.47507	9.68519	6.71727	3.69944	3.67314	4.26215	11.6476	6.16858	5.15776	3.4919	10.7122	3.3339	11.8594	7.03314	15.1356	17.5205	11.4327	5.29959	4.23823	2.89248	6.9931	5.28598	5.71183	5.24718	5.9169	5.10361	4.71141	4.9196	4.40788	5.21895	5.47437	5.45725	5.40092	5.35919	3.4063	3.30856	5.80588
GBM MID	4.54302	18.6067	11.446	7.044	3.46786	3.38909	10.6026	10.3078	12.2768	3.85643	3.46122	3.31876	4.47742	9.67244	6.49805	3.49171	3.42854	4.27052	11.824	6.16582	5.13602	3.47475	11.3812	4.38496	12.3514	5.78869	14.5666	17.1595	11.1939	4.22145	3.97754	3.39168	6.35828	4.54396	4.77213	4.85286	5.3894	4.66769	3.85245	3.88132	3.65134	4.39791	4.72442	4.68609	4.67116	4.61248	3.06327	4.53704	6.71602
GBM MYCN	4.99663	18.8149	10.8075	7.65919	4.55827	4.48755	10.6352	10.1498	11.7405	4.56089	4.07243	4.05651	4.7004	9.60332	7.07281	4.38835	4.2484	4.85185	11.3299	6.79076	5.97958	4.37075	11.6134	5.27176	11.8952	6.07946	14.5109	16.6733	11.1265	5.00082	4.62746	4.21736	6.68058	4.80322	4.6053	4.61182	5.52332	5.01735	4.25664	4.18953	4.09789	4.64911	4.85567	4.9694	4.74331	4.71232	4.13772	5.27378	7.11957
GBM RTK I	5.31127	18.7114	11.1703	7.23967	4.00832	3.92843	10.7021	10.1201	12.2116	4.62564	4.22063	4.15977	5.17473	9.75892	6.9694	4.02391	3.98255	4.62317	11.7063	6.40373	5.44003	3.88107	11.25	4.27756	12.0635	6.5606	14.9391	17.2628	11.3566	4.95861	4.50717	3.5353	6.88171	5.05878	5.22904	5.14547	5.80929	5.15508	4.40083	4.67657	4.21476	5.00486	5.31013	5.3145	5.24964	5.17935	3.64896	4.23759	6.50795
GBM RTK II	5.51309	18.7884	11.1688	7.26724	4.19402	4.10513	10.7036	10.0287	12.1902	4.78369	4.4041	4.32204	5.32923	9.81217	7.11876	4.18225	4.14263	4.74202	11.6453	6.5217	5.55161	4.01132	11.244	4.33823	12.021	6.68582	14.9652	17.3742	11.4587	5.17745	4.61649	3.62795	6.99824	5.13433	5.42079	5.211	5.92483	5.31959	4.52706	4.88423	4.29771	5.13885	5.42705	5.43189	5.40881	5.32772	3.87482	4.24188	6.55059
GBM RTK III	5.16636	18.9959	11.1816	8.01829	4.83382	4.83122	11.0297	10.636	12.2315	4.94065	4.4155	4.42207	4.93174	9.94024	7.52822	4.83539	4.71316	5.48489	11.8633	7.20698	6.36065	4.76111	12.1378	5.62635	12.5332	6.03596	14.5272	16.7966	11.5498	5.12572	4.90562	4.68543	6.93994	4.90783	4.72284	4.79659	5.57452	5.3178	4.25103	4.3379	4.2389	4.80671	5.08657	5.17818	5.12639	5.01577	4.4562	5.64574	7.59511
A IDH	6.54109	20.2234	12.5339	8.88609	6.5723	6.18351	10.8105	11.6189	13.0536	6.19623	6.28425	5.91653	6.28998	10.2474	8.1831	6.23288	6.42127	6.85813	13.3954	7.63801	7.15028	6.5726	12.5171	7.14287	12.6774	6.52247	14.7762	17.8157	10.8493	5.3248	6.1081	6.24631	7.99566	6.30474	6.61005	6.7882	7.77456	6.39848	5.68675	6.48469	6.68831	6.68519	6.64259	6.75061	6.08413	6.32153	6.11824	7.31425	8.63083
A IDH HG	6.09305	19.9543	12.2868	8.46321	5.83316	5.58987	10.6649	11.3468	12.8134	5.60996	5.66324	5.38877	5.83379	10.0196	7.79507	5.56198	5.73347	6.27765	13.04	7.23787	6.61456	5.95359	12.2118	6.50732	12.4607	6.30461	14.7198	17.7351	10.7978	5.00172	5.4985	5.50965	7.7077	5.87174	6.22783	6.26882	7.2745	5.93137	5.19105	5.90964	6.10969	6.17281	6.16889	6.24622	5.67369	5.89739	5.61277	6.76449	8.18391
O IDH	6.66755	20.2622	12.5941	8.99934	6.72604	6.33524	10.8249	11.6382	13.098	6.31066	6.43924	6.07479	6.3939	10.3232	8.27959	6.36815	6.57056	7.0121	13.4996	7.74823	7.28189	6.69701	12.5783	7.29884	12.7381	6.58798	14.8008	17.7943	10.8702	5.4022	6.22133	6.39895	8.05361	6.43951	6.67863	6.93547	7.88584	6.51913	5.80056	6.6204	6.80046	6.80587	6.77174	6.87873	6.18869	6.4316	6.2328	7.47302	8.74807
LYMPHO	10.8722	17.0574	13.4024	9.91888	9.3568	9.08306	13.4113	11.8228	13.7941	9.50667	9.5445	9.61899	11.2163	12.5342	9.52973	9.30907	9.56368	8.76288	12.854	10.1362	9.3033	9.1123	11.2714	7.94855	11.6212	11.0588	17.1444	19.3454	14.5465	9.08669	17.0219	8.59713	10.3147	9.8202	10.5682	10.0179	10.7873	9.69547	22.778	9.62211	9.15013	11.0591	10.2822	9.91616	9.61429	10.4939	9.65136	6.95571	9.29524
PLASMA	7.14064	17.9892	12.3916	7.71481	5.06954	4.85697	11.1429	10.1315	12.1956	6.12082	6.17526	6.03161	7.03123	10.4706	7.39764	5.67289	5.1134	5.44718	11.9609	6.98618	6.44695	5.1589	9.98566	3.24404	11.1254	8.68467	15.4736	18.7529	12.1481	6.62564	5.14423	3.66416	8.26985	7.43352	7.98169	7.11117	7.21777	6.30822	7.12517	6.82557	6.82226	7.11838	7.45033	7.27283	6.91008	7.15683	4.8051	2.60744	5.53447
MELAN	9.15614	18.5685	13.0445	8.97153	9.13468	8.63893	13.0047	9.27739	12.8774	9.05533	9.17303	9.55338	9.82212	11.788	9.06296	8.91701	7.88124	7.97072	13.5533	9.43002	9.61031	8.71624	11.1269	7.23044	12.8476	11.2382	15.6732	19.037	13.9114	9.66744	8.29098	7.49308	10.167	10.1216	9.63945	9.82789	10.2975	8.74079	11.9415	9.06469	8.90737	9.72105	9.28164	9.63674	10.3468	9.71698	8.91017	7.36023	8.61153
MELCYT	10.2255	18.6437	13.8259	9.92478	10.6183	10.2702	13.8074	9.90906	13.8568	10.4526	10.9291	10.9593	11.6343	12.552	10.472	10.6306	9.69604	10.1557	14.4017	10.8938	11.1851	10.5815	12.766	8.98574	12.4954	12.2317	15.2005	19.5791	14.0075	11.0184	9.93319	9.72333	12.4462	11.2991	10.9133	11.5007	11.4583	10.3975	13.7408	10.4688	10.8403	11.141	9.86762	10.745	12.0574	11.1265	10.5139	9.16762	10.1462
CHORDM	6.95931	18.3205	11.7839	7.54132	5.15522	5.18863	10.5088	9.12114	11.9927	6.42089	5.94631	5.79581	7.40701	10.2102	6.89695	5.30584	5.06781	5.55882	11.5171	6.66516	6.38349	5.17913	9.46485	1.50541	11.1687	8.5985	16.1772	18.2885	12.187	7.39079	4.16457	3.3305	7.4755	7.41857	7.18682	7.19929	7.68051	5.85628	7.45964	6.96842	6.7181	7.27549	7.63713	7.28704	7.03793	7.19711	5.53618	1.08143	4.49755
EFT CIC	8.48149	19.4017	12.6138	9.35174	7.71194	7.84761	11.5571	10.7357	13.1264	8.08997	8.02628	7.71344	9.04351	11.9402	8.46526	7.56466	7.60407	7.91149	12.8587	8.47508	8.78973	7.32507	10.7292	5.64279	11.5364	9.51903	16.0943	18.0267	13.0141	9.24766	6.95624	6.47398	9.19091	9.27593	8.41685	8.95135	10.2151	7.33247	9.21773	8.96435	8.08071	8.96117	10.0141	9.14285	9.15418	9.0322	7.89339	5.19005	6.96383
EWS	16.5598	22.4466	18.1805	15.6901	15.6776	16.0914	16.098	12.0908	16.8756	16.3703	15.8151	14.1208	14.5345	18.1967	16.3968	14.689	15.9076	17.883	18.9108	17.1778	17.284	16.9291	16.1233	17.7629	15.9119	17.5371	17.0145	21.3789	12.9571	16.5037	14.7562	16.9263	16.2979	15.931	14.1913	15.6801	17.0764	13.9027	14.0478	14.4082	13.4793	14.8586	13.9809	15.9026	14.7256	14.8862	16.2405	14.7839	16.4093
HMB	7.94606	18.9244	12.1769	8.20447	6.62199	6.29878	10.9997	8.73589	12.2046	7.06613	7.00854	6.82745	8.30059	10.7205	7.50665	6.41673	6.38702	6.63483	11.8548	7.67391	7.66624	6.16197	9.73103	2.79455	10.6793	9.13763	16.6087	18.4611	12.235	8.05465	5.76781	5.02188	7.7637	8.62341	7.24736	8.17729	8.60136	5.82412	8.02281	7.77139	7.23237	7.89775	8.55111	8.10126	7.87455	7.91492	6.70223	3.04604	5.72756
MNG	8.8305	18.4362	11.708	8.78534	7.60419	6.86977	10.7581	10.2969	11.9814	7.84935	7.92095	7.90243	8.67555	10.711	8.45935	7.44883	7.68089	7.82694	12.5314	8.33508	8.15548	7.01206	11.0089	5.47225	9.92128	9.73695	16.168	18.6583	11.6565	8.78966	6.6339	6.76592	8.53258	9.01297	7.85326	9.41943	9.34193	6.68197	8.94895	8.1072	7.7907	8.73336	9.6417	8.937	8.00822	8.31691	7.63127	5.67918	6.68868
SFT HMPC	8.85945	18.6958	11.9463	8.62954	7.12348	6.42863	10.6073	9.68556	11.7881	7.59315	7.41638	7.46245	8.38819	10.9989	8.17626	7.17552	7.12012	7.43431	12.0652	8.00809	8.15332	6.51512	10.6602	4.39159	10.2932	9.53905	16.4154	18.193	12.0922	8.60102	6.56423	5.92088	7.89492	8.79266	7.27738	8.88714	9.08308	6.88056	8.9121	8.0742	7.87799	8.47448	9.02002	8.48847	7.89637	8.1805	7.19324	4.53369	6.13744
SCHW	7.42529	18.4507	12.0284	7.87948	5.80423	5.70759	10.8193	8.66671	11.8672	6.95024	6.45079	6.27567	7.85475	10.6282	7.13089	5.84398	5.71917	6.0261	11.6404	6.99228	6.8812	5.76741	9.40436	2.16046	11.1998	8.80609	16.423	18.2539	12.0658	8.09327	4.69261	4.25582	7.89285	7.74009	7.32187	7.50693	8.19198	6.29823	7.91235	7.43896	7.08285	7.60528	8.1484	7.66305	7.47538	7.53485	5.93611	1.74618	5.04204
SCHW MEL	7.39196	18.4626	11.9979	7.8752	5.75414	5.67737	10.7944	8.71373	11.8836	6.89675	6.41438	6.2464	7.81456	10.5898	7.13132	5.771	5.64889	5.96455	11.6236	6.97105	6.90049	5.71903	9.4099	1.96664	11.1279	8.74905	16.3819	18.3009	12.0723	8.00943	4.63197	4.19442	7.75073	7.77454	7.2132	7.53294	8.12636	6.16351	7.79398	7.3927	6.95562	7.53199	8.1583	7.6057	7.4608	7.50376	5.917	1.56578	4.91792
ANA PA	4.48348	18.2034	11.1674	6.25985	2.59319	2.50537	10.3144	10.1207	11.9835	3.62784	3.03039	3.15562	4.5813	9.26504	5.75678	2.45057	2.32666	3.30152	11.5606	5.55033	4.39509	2.4841	10.7713	3.53881	12.0986	6.27302	14.4656	17.2015	11.2035	4.62322	3.36657	2.47844	6.2608	4.54777	5.17215	4.75398	5.38807	4.48374	4.21669	3.87021	3.79813	4.4826	4.58432	4.65492	4.67649	4.60727	2.1934	3.65092	5.79384
CHGL	6.45694	18.0194	11.7435	6.95672	4.37289	4.33486	10.2809	9.2576	11.8601	5.61682	5.35408	5.18173	6.8797	9.76151	6.35226	4.50082	4.48929	4.69818	11.5884	6.30235	5.75387	4.38914	9.69832	2.02504	11.4751	8.52676	16.0302	17.8007	11.8052	6.76473	3.96154	2.55349	7.40948	6.88991	7.35532	6.95606	7.2502	5.64307	6.77312	6.47225	6.13858	6.79536	6.8133	6.97795	6.48864	6.61994	4.45737	1.79603	4.32567
HGNET MN1	10.8586	16.3411	14.2496	9.89424	8.33623	8.91712	13.6656	13.6271	14.3457	9.24584	8.31988	10.0957	9.08033	13.2118	10.6673	7.92449	8.49334	7.8983	13.6706	11.2791	9.82867	8.00859	13.5987	7.58283	14.8791	10.5084	16.05	17.3434	14.5899	10.0224	8.70325	8.46771	9.63979	8.79567	9.46402	11.1579	10.2941	9.5605	9.63083	8.99655	10.2401	9.93347	10.5394	10.3237	9.5232	9.54986	8.20443	7.69063	10.1597
IHG	4.41711	17.9969	11.4908	5.19906	1.17608	0.93323	10.4466	10.5691	12.463	3.14576	2.79341	3.09837	4.79205	9.34802	5.02438	1.10342	1.08585	1.85325	11.5783	4.99698	3.24077	0.91191	10.3979	4.25184	12.5739	6.26599	14.1049	18.0259	11.7505	5.02702	3.84308	2.67884	6.31413	4.26106	5.80772	4.47764	5.40576	4.74393	4.65043	4.41301	3.89899	4.7705	4.60723	4.79731	4.84409	4.68071	1.5694	4.33494	6.3106
LGG MYB	5.41409	17.6163	11.7829	6.03756	2.74504	2.70565	11.0827	11.1626	12.9514	4.52378	3.99908	4.00983	5.3266	10.3148	6.27865	2.2685	3.48922	3.57358	11.9537	5.92654	5.36494	3.03082	11.5131	5.44326	13.8417	6.19892	14.3958	17.456	12.1099	6.16195	3.82183	4.3921	6.91703	5.63684	6.01592	4.67807	6.64042	5.34115	5.53735	4.27714	5.61546	5.34109	4.75404	5.03193	5.92969	5.62544	3.44287	5.33873	7.6391
LGG PA GG ST	4.52601	18.1786	11.5569	5.48476	1.19109	1.25497	10.3845	10.2205	12.1808	3.27925	2.83221	2.98642	4.85906	9.27994	4.97184	1.3036	1.22227	2.14528	11.6823	5.02369	3.54959	1.20199	10.3397	3.17088	12.1305	6.51713	14.4315	17.5341	11.7602	5.24577	3.09948	2.0723	6.167	4.61501	5.843	4.78071	5.51668	4.59334	4.7077	4.11888	4.06189	4.75326	4.76606	4.83606	4.93095	4.74499	1.36565	3.38138	5.61737
LGG PA MID	4.95085	18.1406	11.4839	6.0332	2.31149	2.32339	10.3171	9.83662	11.9905	3.93899	3.46651	3.42492	5.26149	9.31053	5.49171	2.41422	2.34601	3.12322	11.5832	5.48284	4.26268	2.28301	10.2135	2.27518	11.8536	6.88419	14.7674	17.3964	11.8171	5.59543	2.99833	1.73623	6.4123	5.14838	5.95107	5.28451	5.86173	4.64476	5.08653	4.53253	4.51441	5.12766	5.27855	5.25573	5.20213	5.11982	2.32178	2.35497	4.95143
LGG PA PF	4.59365	18.2059	11.5119	5.83216	1.85371	1.8145	10.3119	10.0283	12.0965	3.44022	2.97523	2.97654	4.87292	9.27033	5.27468	1.95711	1.83479	2.70759	11.6174	5.29522	3.96379	1.81492	10.3092	2.71132	11.9267	6.49076	14.573	17.4042	11.7802	5.206	2.89074	1.86833	6.14437	4.70222	5.69881	4.83307	5.51422	4.49676	4.63797	4.10774	4.04606	4.74277	4.85361	4.86743	4.86911	4.76201	1.73845	2.90374	5.2838
LGG SEGA	6.08045	18.1187	11.5155	6.70229	3.8349	3.78459	10.2858	9.305	11.8784	5.3015	4.81533	4.7302	6.44369	9.58405	6.21741	3.96819	3.84356	4.28781	11.5084	6.08205	5.33779	3.79679	9.74295	1.49181	11.4214	8.053	15.5605	17.6939	11.7318	6.66184	3.46225	1.8297	7.28443	6.44542	6.97078	6.41459	6.79952	5.203	6.29461	5.93074	5.74091	6.27787	6.35733	6.38101	6.22865	6.19415	4.00528	1.18685	4.11488
PXA	4.96167	18.3919	11.2835	6.41244	2.94126	2.82821	10.4495	9.74915	12.0459	4.04316	3.6367	3.51682	5.16899	9.47845	6.06798	2.97805	2.82147	3.63999	11.6243	5.70759	4.59012	2.69515	10.4982	2.81039	11.9939	6.67822	14.9596	17.468	11.4431	5.1321	3.5115	2.24235	6.58678	5.10454	5.42245	5.10771	5.74786	4.57469	4.75565	4.51885	4.19063	4.9488	5.09449	5.12345	5.09221	5.06989	2.67922	2.93387	5.21505
PIN T PB A	18.8456	4.36424	12.4745	18.0478	19.4242	17.8879	17.1782	25.2745	13.5611	19.1813	18.0031	17.6884	17.3045	15.5872	18.0932	17.7846	17.1941	18.5589	7.97679	19.8441	18.6184	17.7938	20.3122	18.4265	14.5817	19.6802	1.74993	3.8743	19.0576	20.1068	18.9201	19.1987	16.0343	18.5428	17.569	19.1516	26.4347	18.0566	21.5732	18.13	16.5942	17.9452	16.715	17.695	18.0219	18.3615	18.1799	18.5218	18.5246
PIN T PB B	19.2729	1.95242	12.6551	18.521	19.005	18.0341	17.7487	24.7286	14.3669	19.5104	18.688	17.9783	17.4948	16.1324	17.9389	18.6287	17.0233	17.7418	9.07969	18.8478	18.3844	18.702	19.4264	19.0968	13.7029	20.4524	3.77392	1.96094	18.7635	20.7219	19.5722	19.7261	16.15	19.5534	17.3868	18.9888	25.8765	17.9169	22.2276	18.5728	17.1746	18.5639	17.303	18.5621	18.5524	18.9188	18.5777	19.0749	18.4174
PIN T PPT	19.1413	0.234925	12.6941	18.1359	19.2546	18.0038	17.3749	25.3748	14.8579	19.006	18.1134	17.2341	17.6134	15.8175	18.1618	18.1316	16.9211	17.4377	8.85103	18.4976	18.5274	18.18	19.495	18.9126	14.6419	20.9149	2.77088	1.88861	18.0588	19.4147	19.3968	19.2922	16.2198	19.4009	18.1191	18.8477	26.1331	17.8395	22.9634	18.6649	17.6148	18.575	17.5755	18.0453	18.5149	18.5995	18.804	18.8254	17.8812
PTPR A	10.7697	17.4268	11.5338	11.435	12.2673	11.7788	10.981	11.6056	10.8024	11.9352	12.19	11.5051	10.7298	11.8182	12.6519	11.9017	10.9493	11.2655	13.4188	11.6842	11.8605	11.7857	13.0037	12.73	10.5005	13.1647	16.6344	19.1856	7.73976	8.73706	12.3539	11.9923	12.2827	11.6586	13.6949	12.9674	11.5296	12.0697	11.7115	12.2513	10.7769	11.4559	9.89191	11.1233	11.5003	11.4324	12.9658	12.6289	11.6364
PTPR B	10.6254	17.6097	11.5945	11.561	12.2619	11.8071	11.0836	11.6885	10.8693	12.0249	12.2808	11.553	10.8139	11.8277	12.7655	11.9789	11.0745	11.3194	13.5248	11.6571	11.9888	11.7411	13.0342	12.8875	10.2662	13.2632	16.6991	19.2805	7.73324	8.95643	12.3768	12.0272	12.3944	11.6946	13.7505	12.8506	11.6448	12.1629	11.9128	12.2489	10.8723	11.5102	9.97279	11.1716	11.4537	11.4435	13.1835	12.7756	11.5871
PLEX AD	9.35626	17.5322	10.5475	10.4373	11.6825	10.8273	11.2546	11.3265	10.7321	11.4765	11.2035	10.4279	10.983	11.0239	11.1269	11.0225	10.2261	10.6143	11.8441	11.3397	11.6214	11.7762	12.823	11.9624	11.7796	11.9456	15.9179	18.3029	3.30917	10.1232	11.7554	11.7679	11.7762	12.0701	12.9425	12.6256	11.0568	11.7307	10.7332	10.7426	9.70381	10.6747	9.97527	10.9233	10.917	11.1453	12.4861	11.6157	11.4198
PLEX PED A	9.56222	17.4888	10.5117	10.4717	11.8491	10.8598	11.0124	11.2012	10.6699	11.5648	11.4474	10.4188	10.9715	11.0467	11.065	11.2945	10.4325	10.6125	11.8197	11.4633	11.5737	11.8355	12.7665	11.98	11.4324	12.091	15.9975	18.3184	3.78801	10.2463	11.9964	11.93	11.8775	12.0328	12.8785	12.7677	11.1805	11.814	10.8689	10.7871	9.6791	10.6961	9.89146	10.8852	10.9116	11.2335	12.8702	11.6244	11.5667
PLEX PED B	8.90449	16.2602	9.90255	10.4426	11.5463	10.4114	10.389	10.6432	10.4507	11.2099	11.3802	9.87558	10.2524	10.5971	10.6229	10.9402	10.2032	10.2841	11.1283	11.2034	11.1783	11.4405	12.5333	11.7538	10.9908	11.8177	15.4777	17.6385	4.98496	8.72442	11.7448	11.6532	11.3683	10.815	12.5361	12.4005	10.6192	11.2163	10.5983	10.2462	9.31566	10.2947	9.28953	10.2976	10.1614	10.6755	12.6614	11.5641	11.3514
CPH ADM	15.1263	20.3195	20.128	16.0872	15.7839	15.5232	17.8311	15.0643	17.9555	14.9751	15.2509	15.9974	16.378	17.8546	15.7546	14.4383	14.1741	15.0543	19.5472	16.9847	15.0671	13.9699	16.2027	14.4175	15.9921	17.6161	17.7805	20.8421	19.2401	13.0146	13.9344	14.758	15.943	16.5217	14.8538	15.2202	16.1395	14.5293	15.8894	16.1603	16.278	15.9286	16.1098	16.2693	15.7308	15.7673	13.1619	13.9795	16.8406
CPH PAP	11.5507	17.5527	15.5649	11.6173	9.93222	10.2666	14.4201	12.4992	15.592	10.3708	10.2236	10.7564	11.6257	14.7087	11.2442	9.79245	10.1012	10.0871	14.9782	11.3745	11.8809	10.3254	12.9513	8.82563	13.8031	11.8069	17.7848	18.7705	15.3802	11.7955	9.2318	11.4705	11.1519	11.1579	11.4486	11.053	12.2375	12.1978	10.3509	10.5192	11.6957	11.5964	12.2711	12.5449	11.1083	11.5558	11.1341	9.87262	11.3911
PITAD ACTH	16.4161	19.8547	19.2655	16.7215	16.3639	16.1552	20.2443	17.6296	18.7084	17.1494	15.3045	16.8147	18.0859	19.4085	18.0731	15.5801	16.0533	15.2955	19.3593	17.807	16.5325	15.4453	17.8629	14.8683	19.0764	16.0989	19.8796	21.7797	21.4372	14.5571	15.1086	16.3419	15.9237	17.3918	15.4663	18.3861	16.732	16.0677	19.3316	16.1958	17.4244	16.5454	15.2674	15.8434	14.8504	16.2385	15.2746	13.8107	16.8876
PITAD FSH LH	17.34	20.0806	19.749	17.3444	17.2167	17.006	21.0972	18.0751	19.2659	18.1974	16.1504	17.3256	18.9894	20.3649	18.7103	16.6108	17.0513	16.7209	19.5689	19.1903	17.6023	16.5537	18.6402	15.8903	19.9912	16.756	19.9426	21.7871	22.357	14.7336	15.9915	17.2282	16.8362	18.3196	16.5688	19.4993	17.2659	17.4717	19.4726	17.2164	18.0121	17.3173	16.0124	16.7556	15.7852	17.211	16.1802	14.9283	18.0537
PITAD PRL	16.4983	20.1878	19.0497	16.6282	16.1828	15.926	19.9501	17.7535	18.6353	16.9618	15.2051	16.8403	17.8429	19.1352	17.933	15.2868	15.9916	15.0661	19.3132	17.6382	16.3842	15.4137	17.6521	14.7396	19.0535	16.0294	19.9521	21.9758	21.3551	14.491	15.0949	16.3728	15.7888	17.5463	15.1021	17.9818	16.6508	15.8819	19.3574	15.9973	17.3243	16.5837	15.428	16.1097	14.8182	16.1687	15.2318	13.5248	16.7034
PITAD STH DNS A	16.4945	20.1853	19.0418	16.6158	16.2427	15.9325	19.952	17.7772	18.6305	16.9952	15.2391	16.8147	17.9048	19.1419	17.9081	15.3045	16.061	15.0093	19.2647	17.6539	16.4029	15.4021	17.6536	14.7474	19.0605	16.08	19.9579	21.8935	21.4063	14.4956	15.1015	16.403	15.8222	17.5393	15.0846	18.0644	16.6791	15.9064	19.4099	15.978	17.3712	16.5733	15.3567	16.0459	14.851	16.179	15.2184	13.5224	16.712
PITAD STH DNS B	16.5524	20.1849	18.9836	16.6122	16.1954	15.9311	19.9244	17.7288	18.6129	16.9734	15.2129	16.8408	17.8843	19.1435	17.8665	15.2077	16.0809	14.9504	19.2165	17.6188	16.3955	15.352	17.6158	14.7448	19.0442	16.0593	19.984	22.0166	21.3588	14.4802	15.1708	16.42	15.8436	17.6739	15.0625	17.8966	16.6393	15.872	19.4269	15.9803	17.3304	16.6014	15.3934	16.1111	14.8238	16.1557	15.2611	13.5052	16.6922
PITAD STH SPA	16.6359	20.343	18.8917	16.6192	16.0815	15.8172	19.821	17.6035	18.615	16.9487	15.1757	16.9046	17.8188	19.1085	17.8387	15.0947	16.1309	14.8652	19.1646	17.5347	16.3707	15.3283	17.544	14.7643	19.0424	16.0282	20.0789	22.1849	21.1887	14.3302	15.2739	16.4428	15.8426	17.866	15.0545	17.6677	16.6151	15.8129	19.4335	15.8462	17.2311	16.6201	15.5493	16.2122	14.7469	16.12	15.4217	13.5437	16.7022
PITAD TSH	16.4893	20.2184	19.0706	16.6461	16.2548	15.8934	19.9417	17.8105	18.6504	16.9597	15.2488	16.7834	17.925	19.131	17.9589	15.3106	16.049	15.0021	19.2797	17.6581	16.3799	15.3834	17.6327	14.7474	19.0427	16.07	19.9633	21.873	21.4276	14.5312	15.0838	16.4212	15.828	17.4987	15.0756	18.1265	16.7245	15.8954	19.4172	15.9265	17.4151	16.5583	15.3255	16.008	14.85	16.1663	15.1747	13.4905	16.7078
PITUI	8.17173	18.762	11.7817	9.19061	6.92012	7.64573	11.1852	11.7315	11.446	8.40182	7.6773	8.68077	8.61898	11.2886	9.35357	7.65469	6.79705	7.70396	12.0117	7.85343	8.38275	6.82079	10.7802	5.94022	11.8549	10.4277	15.0149	18.663	12.4016	8.5421	7.4511	6.67248	9.08369	9.36986	9.34824	9.33376	9.35168	8.43708	9.16635	9.11663	7.97013	9.02162	9.678	9.04175	9.08165	8.69557	6.75513	5.90052	7.10816
[truncated: 58 more columns]

## Sheet: ST4_Human_Mouse_Matching
ID in Oncoplot	Model	Type	Family	Class	RF_Predicition	RF_Predicition Group	UMAP_Predicition	UMAP_Prediction Group	Match
1	PlexusCarcinoma_hGFAP_cre_P53Fl_Fl_lsl_MYCNFl_wt_CAG_Gli2	PlexusCarcinoma	ChoroidPlexus	ChoroidPlexus	CONTR CEBM	Control	CONTR CEBM	Control	No
2	PlexusCarcinoma_Lmax1a_cre_P53f_f_Rbf_f	PlexusCarcinoma	ChoroidPlexus	ChoroidPlexus	RETB	Glio-neuronal	PIN T PPT	Pineal	No
3	Brainstem_Wildtype_P0	Brainstem	Control	Brain	ETMR	ETMR	ATRT TYR	ATRT	No
4	Brainstem_Wildtype_P14	Brainstem	Control	Brain	ETMR	ETMR	ATRT TYR	ATRT	No
5	Brainstem_Wildtype_P21	Brainstem	Control	Brain	CONTR HEMI	Control	CONTR HEMI	Control	Yes
6	Brainstem_Wildtype_P28	Brainstem	Control	Brain	CONTR HEMI	Control	CONTR HEMI	Control	Yes
7	Brainstem_Wildtype_P7	Brainstem	Control	Brain	ETMR	ETMR	ATRT TYR	ATRT	No
8	Cerebellum_CtrlCBE16	Cerebellum	Control	Brain	ETMR	ETMR	ATRT TYR	ATRT	No
9	Cerebellum_Wildtype_P0	Cerebellum	Control	Brain	PTPR A	Pineal	ATRT TYR	ATRT	No
10	Cerebellum_Wildtype_P14	Cerebellum	Control	Brain	CONTR HEMI	Control	CONTR CEBM	Control	Yes
11	Cerebellum_Wildtype_P21	Cerebellum	Control	Brain	CONTR CEBM	Control	CONTR CEBM	Control	Yes
12	Cerebellum_Wildtype_P28	Cerebellum	Control	Brain	CONTR CEBM	Control	CONTR CEBM	Control	Yes
13	Cerebellum_Wildtype_P7	Cerebellum	Control	Brain	CONTR HEMI	Control	MB SHH INF	MB SHH	RF
14	Cerebralcortex_Wildtype_P0	Cerebralcortex	Control	Brain	CN	Glio-neuronal	ATRT TYR	ATRT	No
15	Cerebralcortex_Wildtype_P14	Cerebralcortex	Control	Brain	CONTR HEMI	Control	ATRT TYR	ATRT	RF
16	Cerebralcortex_Wildtype_P21	Cerebralcortex	Control	Brain	CONTR HEMI	Control	CONTR HEMI	Control	Yes
17	Cerebralcortex_Wildtype_P28	Cerebralcortex	Control	Brain	CPH ADM	Sella	CONTR HEMI	Control	UMAP
18	Cerebralcortex_Wildtype_P7	Cerebralcortex	Control	Brain	ETMR	ETMR	CONTR HEMI	Control	UMAP
19	MuscleControl_Wildtype_adult	Control	Control	Thigh	CPH ADM	Sella	LGG DIG DIA	Glio-neuronal	No
20	Thalamus_Wildtype_P0	Thalamus	Control	Brain	PTPR A	Pineal	ATRT TYR	ATRT	No
21	Thalamus_Wildtype_P14	Thalamus	Control	Brain	CONTR HYPTHAL	Control	LGG GG	Glio-neuronal	RF
22	Thalamus_Wildtype_P21	Thalamus	Control	Brain	CONTR HYPTHAL	Control	ATRT TYR	ATRT	RF
23	Thalamus_Wildtype_P28	Thalamus	Control	Brain	CONTR HEMI	Control	CONTR HEMI	Control	Yes
24	Thalamus_Wildtype_P7	Thalamus	Control	Brain	ETMR	ETMR	ATRT TYR	ATRT	No
25	ATRT_MYC_R26_Myc	ATRT_MYC	Embryonal	otherembryonaltumors	ATRT MYC	ATRT	LGG DIG DIA	Glio-neuronal	RF
26	ATRT_MYC_Rosa26_creERT2_Smarcb1	ATRT_MYC	Embryonal	otherembryonaltumors	ATRT MYC	ATRT	LGG DIG DIA	Glio-neuronal	RF
27	ATRT_MYC_Sox2_creERT2_Smarcb1	ATRT_MYC	Embryonal	otherembryonaltumors	ATRT MYC	ATRT	LGG DIG DIA	Glio-neuronal	RF
28	ATRT_SHH_R26_SHH	ATRT_SHH	Embryonal	otherembryonaltumors	ATRT TYR	ATRT	ATRT TYR	ATRT	Yes
29	ATRT_SHH_Rosa26_creERT2_Smarcb1	ATRT_SHH	Embryonal	otherembryonaltumors	ATRT TYR	ATRT	ATRT TYR	ATRT	Yes
30	CNS_neuroblastoma_FOXR2_Foxr2_Trp53KO	CNS_neuroblastoma_FOXR2	Embryonal	otherembryonaltumors	CNS NB FOXR2	CNS NB FOXR	CONTR HEMI	Control	RF
31	ETMR_hGFAP_cre_CtnnB1_SmoM2	ETMR	Embryonal	otherembryonaltumors	PTPR A	Pineal	ATRT TYR	ATRT	No
32	MB_Gr_3_Cmyc+Brg1	MB_Gr_3	Embryonal	Medulloblastoma	CONTR HEMI	Control	ATRT TYR	ATRT	No
33	MB_Gr_3_cMyctransplantedcerebellarcells	MB_Gr_3	Embryonal	Medulloblastoma	CONTR CEBM	Control	MB SHH INF	MB SHH	No
34	MB_Gr_3_Glt1_tTA_TRE_MYCN_Luc	MB_Gr_3	Embryonal	Medulloblastoma	CONTR CEBM	Control	RETB	Glio-neuronal	No
35	MB_Gr_3_Gr3__MYCNSchulte	MB_Gr_3	Embryonal	Medulloblastoma	PIN T PPT	Pineal	CONTR PINEAL	Control	No
36	MB_Gr_3_LRL_Myc_Trp53DN_Atoh1_Cre	MB_Gr_3	Embryonal	Medulloblastoma	CONTR HEMI	Control	ATRT TYR	ATRT	No
37	MB_Gr_3_LRL_Myc_Trp53DN_Gad2_IRES_Cre	MB_Gr_3	Embryonal	Medulloblastoma	MB SHH INF	MB SHH	MB SHH INF	MB SHH	No
38	MB_Gr_3_LRL_Myc_Trp53DN_Ptf1a_Cre	MB_Gr_3	Embryonal	Medulloblastoma	CONTR CEBM	Control	CONTR CEBM	Control	No
39	MB_Gr_4_p53DN_srcCA	MB_Gr_4	Embryonal	Medulloblastoma	CONTR HEMI	Control	CONTR REACT	Control	No
40	MB_SHH_Elp1cKO_Ptch1	MB_SHH	Embryonal	Medulloblastoma	MB SHH CHL AD	MB SHH	MB SHH INF	MB SHH	Yes
41	MB_SHH_Elp1WT_Ptch1	MB_SHH	Embryonal	Medulloblastoma	MB SHH INF	MB SHH	MB SHH INF	MB SHH	Yes
42	MB_SHH_Math1_Cre_Gli2A	MB_SHH	Embryonal	Medulloblastoma	MB SHH INF	MB SHH	MB SHH INF	MB SHH	Yes
43	MB_SHH_Math1_cre_Ptch1Fl_Fl	MB_SHH	Embryonal	Medulloblastoma	MB SHH INF	MB SHH	MB SHH INF	MB SHH	Yes
44	MB_SHH_Math1_cre_SmoM2	MB_SHH	Embryonal	Medulloblastoma	MB SHH INF	MB SHH	MB SHH INF	MB SHH	Yes
45	MB_SHH_Math1_CreERT_Gli2A	MB_SHH	Embryonal	Medulloblastoma	CONTR HEMI	Control	MB SHH INF	MB SHH	UMAP
46	MB_SHH_Ptch1	MB_SHH	Embryonal	Medulloblastoma	MB SHH INF	MB SHH	MB SHH INF	MB SHH	Yes
47	MB_SHH_Ptch1_BcorKO	MB_SHH	Embryonal	Medulloblastoma	MB SHH INF	MB SHH	MB SHH INF	MB SHH	Yes
48	MB_SHH_Ptch1_Elp1KO	MB_SHH	Embryonal	Medulloblastoma	MB SHH INF	MB SHH	MB SHH INF	MB SHH	Yes
49	MB_SHH_Ptch1(+_d)_Bcor(p_p)_Atoh_Cre	MB_SHH	Embryonal	Medulloblastoma	MB SHH INF	MB SHH	CONTR CEBM	Control	RF
50	MB_SHH_Ptch1KO	MB_SHH	Embryonal	Medulloblastoma	MB SHH INF	MB SHH	MB SHH INF	MB SHH	Yes
51	MB_SHH_Ptch1KO_Trp53KO	MB_SHH	Embryonal	Medulloblastoma	MB SHH INF	MB SHH	MB SHH INF	MB SHH	Yes
52	MB_SHH_SHH	MB_SHH	Embryonal	Medulloblastoma	MB SHH INF	MB SHH	MB SHH INF	MB SHH	Yes
53	MB_SHH_SHH_Ptch1+___Atoh1_EGFP	MB_SHH	Embryonal	Medulloblastoma	MB SHH INF	MB SHH	MB SHH INF	MB SHH	Yes
54	MB_WNT_Blbp_cre_Ctnnb1Fl_Fl_TP53Fl_Fl	MB_WNT	Embryonal	Medulloblastoma	CONTR HEMI	Control	CONTR CEBM	Control	No
55	MRT_SMARCB1_P53	MRT	Embryonal	otherembryonaltumors	CONTR HEMI	Control	LGG DIG DIA	Glio-neuronal	No
56	Ependymoma_YAP_ST_EPN_YAP1	Ependymoma_YAP	Glioma	Ependymoma	CHORDM	Mesenchymal	LGG DIG DIA	Glio-neuronal	No
57	Ependymoma_ZFTA_pT2K_C11orf95_RELA_HA_IRES_Luc_T2TP	Ependymoma_ZFTA	Glioma	Ependymoma	PLEX PED B	Plexus	CONTR REACT	Control	No
58	Ependymoma_ZFTA_ST_EPN_RELA	Ependymoma_ZFTA	Glioma	Ependymoma	CONTR HEMI	Control	CONTR REACT	Control	No
59	Ependymoma_ZFTA_ZFTA_MAML2	Ependymoma_ZFTA	Glioma	Ependymoma	CONTR HEMI	Control	LGG DIG DIA	Glio-neuronal	No
60	Ependymoma_ZFTA_ZFTA_MAML3	Ependymoma_ZFTA	Glioma	Ependymoma	CONTR HEMI	Control	LGG DIG DIA	Glio-neuronal	No
61	Ependymoma_ZFTA_ZFTA_NCOA2	Ependymoma_ZFTA	Glioma	Ependymoma	CPH ADM	Sella	LGG DIG DIA	Glio-neuronal	No
62	Ependymoma_ZFTA_ZFTA_YAP1	Ependymoma_ZFTA	Glioma	Ependymoma	CONTR HEMI	Control	CONTR REACT	Control	No
63	GBM_hGFAP_cre_P53	GBM	Glioma	Adult_type_diffuse_glioma	CNS NB FOXR2	CNS NB FOXR2	GBM MID	GBM	UMAP
64	GBM_p53_NF1_PTEN	GBM	Glioma	Adult_type_diffuse_glioma	SCHW	Nerve	CONTR REACT	Control	No
65	H3G34_H3_3G34R_PDGFRA_AtrxKO_Trp53KO	H3G34	Glioma	PediatricHighGradeGlioma	CONTR HEMI	Control	IHG	GBM	No
66	H3G34_pHGGwithH3G34R_mut	H3G34	Glioma	PediatricHighGradeGlioma	O IDH	IDH-mutant gliomas	GBM MID	GBM	No
67	H3K27M_DMG	H3K27M	Glioma	PediatricHighGradeGlioma	O IDH	IDH-mutant gliomas	DMG K27	H3K27	UMAP
68	H3K27M_DMG+ACVR1_mut	H3K27M	Glioma	PediatricHighGradeGlioma	O IDH	IDH-mutant gliomas	DMG K27	H3K27	UMAP
69	H3K27M_DMG+ACVR1_WT	H3K27M	Glioma	PediatricHighGradeGlioma	O IDH	IDH-mutant gliomas	DMG K27	H3K27	UMAP
70	H3K27M_H3_3K27M_AtrxKO_Trp53KO	H3K27M	Glioma	PediatricHighGradeGlioma	A IDH HG	IDH-mutant gliomas	CONTR HEMI	Control	No
71	H3K27M_H3_3K27M_Nf1KO_Trp53KO	H3K27M	Glioma	PediatricHighGradeGlioma	CONTR HEMI	Control	DMG K27	H3K27	UMAP
72	H3K27M_H3_3K27M_PDGFRA_Trp53KO	H3K27M	Glioma	PediatricHighGradeGlioma	CONTR HEMI	Control	CONTR REACT	Control	No
73	IDH_H3WT_CLIP1_ROS1_Trp53	IDH_H3WT	Glioma	PediatricHighGradeGlioma	CONTR HEMI	Control	LGG GG	Glio-neuronal	No
74	IDH_H3WT_DMG_WT	IDH_H3WT	Glioma	PediatricHighGradeGlioma	O IDH	IDH-mutant gliomas	GBM MID	GBM	UMAP
75	IDH_H3WT_EGFR_VIII_EGFR_PtenKO_Cdkn2aKO	IDH_H3WT	Glioma	PediatricHighGradeGlioma	A IDH HG	IDH-mutant gliomas	LGG GG	Glio-neuronal	No
76	IDH_H3WT_EpisomalEGFR_VIII+EGFR_PtenKO_Cdkn2aKO	IDH_H3WT	Glioma	PediatricHighGradeGlioma	A IDH HG	IDH-mutant gliomas	CONTR HEMI	Control	No
77	IDH_H3WT_EpisomalEGFRVIII_PTENKO_Cdkn2aKO	IDH_H3WT	Glioma	PediatricHighGradeGlioma	A IDH HG	IDH-mutant gliomas	CONTR HEMI	Control	No
78	IDH_H3WT_FGFR_N546K	IDH_H3WT	Glioma	PediatricHighGradeGlioma	A IDH HG	IDH-mutant gliomas	CONTR HYPTHAL	Control	No
79	IDH_H3WT_FGFR_N546K_Cdkn2aKO	IDH_H3WT	Glioma	PediatricHighGradeGlioma	CONTR HEMI	Control	LGG GG	Glio-neuronal	No
80	IDH_H3WT_FGFR_N546K_Trp53KO	IDH_H3WT	Glioma	PediatricHighGradeGlioma	A IDH HG	IDH-mutant gliomas	IHG	GBM	UMAP
81	IDH_H3WT_FGFR1_K656E	IDH_H3WT	Glioma	PediatricHighGradeGlioma	CONTR CEBM	Control	DMG K27	H3K27	No
82	IDH_H3WT_FGFR1_K656E_Cdkn2aKO	IDH_H3WT	Glioma	PediatricHighGradeGlioma	O IDH	IDH-mutant gliomas	DMG K27	H3K27	No
83	IDH_H3WT_FGFR1_K656E_Nf1KO	IDH_H3WT	Glioma	PediatricHighGradeGlioma	CONTR HEMI	Control	LGG GG	Glio-neuronal	No
84	IDH_H3WT_GOPC_ROS1_Trp53	IDH_H3WT	Glioma	PediatricHighGradeGlioma	CONTR HEMI	Control	LGG GG	Glio-neuronal	No
85	IDH_H3WT_hGFAP_cre_P53_MYCN	IDH_H3WT	Glioma	PediatricHighGradeGlioma	CNS NB FOXR2	CNS NB FOXR2	CONTR HYPTHAL	Control	No
86	IDH_H3WT_MET_FL_Trp53	IDH_H3WT	Glioma	PediatricHighGradeGlioma	SCHW	Nerve	CONTR REACT	Control	No
87	IDH_H3WT_NF1KO_Trp53KO	IDH_H3WT	Glioma	PediatricHighGradeGlioma	CONTR CEBM	Control	CONTR CEBM	Control	No
88	IDH_H3WT_Nf1KO_Trp53KO	IDH_H3WT	Glioma	PediatricHighGradeGlioma	CONTR HEMI	Control	GBM MID	GBM	UMAP
89	IDH_H3WT_Nf1KO_Trp53KO_PtenKO	IDH_H3WT	Glioma	PediatricHighGradeGlioma	O IDH	IDH-mutant gliomas	LGG MYB	Glio-neuronal	No
90	IDH_H3WT_p53DN_srcCA	IDH_H3WT	Glioma	PediatricHighGradeGlioma	CONTR HEMI	Control	CONTR CEBM	Control	No
91	IDH_H3WT_PDGFRA_Trp53KO	IDH_H3WT	Glioma	PediatricHighGradeGlioma	CONTR HEMI	Control	CONTR REACT	Control	No
92	IDH_H3WT_PPP1CB_ALK	IDH_H3WT	Glioma	PediatricHighGradeGlioma	A IDH HG	IDH-mutant gliomas	DMG K27	H3K27	No
93	IDH_H3WT_PPP1CB_ALK_Cdkn2aKO	IDH_H3WT	Glioma	PediatricHighGradeGlioma	A IDH	IDH-mutant gliomas	ANA PA	Other glioma	No
94	IDH_H3WT_PPP1CB_ALK_Trp53KO	IDH_H3WT	Glioma	PediatricHighGradeGlioma	O IDH	IDH-mutant gliomas	LGG DNT	Glio-neuronal	No
95	IDH_H3WT_QKI_NTRK2_Cdkn2aKO	IDH_H3WT	Glioma	PediatricHighGradeGlioma	O IDH	IDH-mutant gliomas	DMG K27	H3K27	No
96	IDH_H3WT_QKI_NTRK2_Trp53KO	IDH_H3WT	Glioma	PediatricHighGradeGlioma	O IDH	IDH-mutant gliomas	GBM MID	GBM	UMAP
97	IDH_H3WT_ROS1_Ex35_Trp53	IDH_H3WT	Glioma	PediatricHighGradeGlioma	CONTR HEMI	Control	CONTR HYPTHAL	Control	No
98	IDH_H3WT_TFG_MET	IDH_H3WT	Glioma	PediatricHighGradeGlioma	CONTR HEMI	Control	DMG K27	H3K27	No
99	IDH_H3WT_TFG_MET_Trp53KO	IDH_H3WT	Glioma	PediatricHighGradeGlioma	CONTR HEMI	Control	IHG	GBM	UMAP
100	IDH_H3WT_Trp53KO_Rb1KO_p107KO	IDH_H3WT	Glioma	PediatricHighGradeGlioma	CONTR HYPTHAL	Control	CONTR HEMI	Control	No
101	PilocyticAstrocytoma_BRAF_Cdkn2aKO	PilocyticAstrocytoma	Glioma	AstrocyticGlioma	CONTR HEMI	Control	CONTR HEMI	Control	No
102	PilocyticAstrocytoma_BRAF_VEKIN	PilocyticAstrocytoma	Glioma	AstrocyticGlioma	A IDH	IDH-mutant gliomas	CONTR REACT	Control	No
103	Neuroblastoma_MYCN_NMYC	Neuroblastoma_MYCN	Neuroblastoma	Neuroblastoma	CONTR CEBM	Control	PGG nC	Glio-neuronal	No
104	Neuroblastoma_MYCN_NMYC_ALK	Neuroblastoma_MYCN	Neuroblastoma	Neuroblastoma	CONTR HEMI	Control	LGG DIG DIA	Glio-neuronal	No
105	MPNST_Nf1_P53	MPNST	Other	Other	SCHW	Nerve	LGG DIG DIA	Glio-neuronal	No
106	MPNST_NF1_sg_P53	MPNST	Other	Other	SFT HMPC	Mesenchymal	LGG DIG DIA	Glio-neuronal	No
107	other_LSL_PLAG1(+_d)_hGFAP_Cre	other	Other	other	CPH ADM	Sella	HMB	Mesenchymal	No

## Sheet: ST5_UMAP_Statistics
Model	Samples	Match Group	Matches	Probability	FDR adjusted_p
ATRT_SHH_R26_SHH	3	ATRT	3	0.032967	0.0000717
ATRT_SHH_Rosa26_creERT2_Smarcb1	3	ATRT	3	0.032967	0.0000717
Brainstem_Wildtype_P21	6	Control	6	0.1	0.00000309
Brainstem_Wildtype_P28	6	Control	6	0.1	0.00000309
Cerebellum_Wildtype_P14	6	Control	6	0.1	0.00000309
Cerebellum_Wildtype_P21	6	Control	6	0.1	0.00000309
Cerebellum_Wildtype_P28	6	Control	6	0.1	0.00000309
Cerebralcortex_Wildtype_P21	6	Control	6	0.1	0.00000309
Cerebralcortex_Wildtype_P28	6	Control	6	0.1	0.00000309
Cerebralcortex_Wildtype_P7	6	Control	5	0.1	0.0000966
GBM_hGFAP_cre_P53	3	GBM	2	0.0879121	0.0218
H3K27M_DMG	6	DMG K27	4	0.010989	0.00000182
H3K27M_DMG+ACVR1_mut	3	DMG K27	2	0.010989	0.000554
H3K27M_DMG+ACVR1_WT	2	DMG K27	2	0.010989	0.000205
H3K27M_H3_3K27M_Nf1KO_Trp53KO	3	DMG K27	2	0.010989	0.000554
IDH_H3WT_DMG_WT	3	GBM	2	0.0879121	0.0218
IDH_H3WT_FGFR_N546K_Trp53KO	3	GBM	3	0.0879121	0.000963
IDH_H3WT_Nf1KO_Trp53KO	4	GBM	2	0.0879121	0.0386
IDH_H3WT_QKI_NTRK2_Trp53KO	3	GBM	2	0.0879121	0.0218
IDH_H3WT_TFG_MET_Trp53KO	3	GBM	2	0.0879121	0.0218
MB_SHH_Elp1cKO_Ptch1	3	MB SHH	3	0.021978	0.0000241
MB_SHH_Elp1WT_Ptch1	3	MB SHH	2	0.021978	0.00166
MB_SHH_Math1_Cre_Gli2A	3	MB SHH	3	0.021978	0.0000241
MB_SHH_Math1_cre_Ptch1Fl_Fl	3	MB SHH	2	0.021978	0.00166
MB_SHH_Math1_cre_SmoM2	6	MB SHH	6	0.021978	0.00000000383
MB_SHH_Math1_CreERT_Gli2A	3	MB SHH	3	0.021978	0.0000241
MB_SHH_Ptch1	3	MB SHH	3	0.021978	0.0000241
MB_SHH_Ptch1_BcorKO	2	MB SHH	2	0.021978	0.000714
MB_SHH_Ptch1_Elp1KO	3	MB SHH	2	0.021978	0.00166
MB_SHH_Ptch1KO	4	MB SHH	3	0.021978	0.0000784
MB_SHH_Ptch1KO_Trp53KO	3	MB SHH	2	0.021978	0.00166
MB_SHH_SHH	10	MB SHH	7	0.021978	0.00000000473
MB_SHH_SHH_Ptch1+___Atoh1_EGFP	6	MB SHH	5	0.021978	0.000000341
Thalamus_Wildtype_P28	6	Control	4	0.1	0.00165

## Sheet: ST6_RF_Statistics
Model	Samples	Match Group	Matches	Probability	FDR adjusted_p
ATRT_MYC_R26_Myc	3	ATRT	2	0.032967	0.00364
ATRT_MYC_Rosa26_creERT2_Smarcb1	3	ATRT	1	0.032967	0.0925
ATRT_MYC_Sox2_creERT2_Smarcb1	1	ATRT	1	0.032967	0.0353
ATRT_SHH_R26_SHH	3	ATRT	2	0.032967	0.00364
ATRT_SHH_Rosa26_creERT2_Smarcb1	3	ATRT	1	0.032967	0.0925
Brainstem_Wildtype_P21	6	Control	5	0.0989011	0.00009
Brainstem_Wildtype_P28	6	Control	6	0.0989011	0.00000375
Cerebellum_Wildtype_P14	6	Control	4	0.0989011	0.00159
Cerebellum_Wildtype_P21	6	Control	6	0.0989011	0.00000375
Cerebellum_Wildtype_P28	6	Control	6	0.0989011	0.00000375
Cerebellum_Wildtype_P7	6	Control	5	0.0989011	0.00009
Cerebralcortex_Wildtype_P14	6	Control	4	0.0989011	0.00159
Cerebralcortex_Wildtype_P21	6	Control	4	0.0989011	0.00159
CNS_neuroblastoma_FOXR2_Foxr2_Trp53KO	3	CNS NB FOXR2	1	0.010989	0.0353
MB_SHH_Elp1cKO_Ptch1	3	MB SHH	3	0.021978	0.0000212
MB_SHH_Elp1WT_Ptch1	3	MB SHH	3	0.021978	0.0000212
MB_SHH_Math1_Cre_Gli2A	3	MB SHH	2	0.021978	0.00177
MB_SHH_Math1_cre_Ptch1Fl_Fl	3	MB SHH	3	0.021978	0.0000212
MB_SHH_Math1_cre_SmoM2	6	MB SHH	4	0.021978	0.0000112
MB_SHH_Ptch1	3	MB SHH	3	0.021978	0.0000212
MB_SHH_Ptch1(+_d)_Bcor(p_p)_Atoh_Cre	3	MB SHH	3	0.021978	0.0000212
MB_SHH_Ptch1_BcorKO	2	MB SHH	2	0.021978	0.000763
MB_SHH_Ptch1_Elp1KO	3	MB SHH	3	0.021978	0.0000212
MB_SHH_Ptch1KO	4	MB SHH	4	0.021978	0.00000175
MB_SHH_Ptch1KO_Trp53KO	3	MB SHH	2	0.021978	0.00177
MB_SHH_SHH	10	MB SHH	10	0.021978	0.0000000000000000789
MB_SHH_SHH_Ptch1+___Atoh1_EGFP	6	MB SHH	5	0.021978	0.000000301
Thalamus_Wildtype_P14	6	Control	5	0.021978	0.000000301
Thalamus_Wildtype_P21	6	Control	5	0.1	0.00009
Thalamus_Wildtype_P28	6	Control	6	0.1	0.00000375

## Sheet: ST7_CpG_Deconvolution
CpGs for Deconvolution
rs254673009_TC11
cg48215486_TC12
rs254673009_BC21
cg29249945_TC11
rs258027624_BC21
cg38658987_BC11
cg30983579_BC21
cg29712332_TC21
cg34142967_BC11
cg42671407_TC21
cg48272592_TC11
cg33631478_TC11
cg45136308_BC11
cg31570630_BC21
cg44940324_BC11
cg37139753_TC21
cg34712560_TC11
cg34425719_TC21
cg36971227_BC11
rs258027624_BC11
rs242399136_BC11
rs258027624_BC12
cg34425718_BC21
cg30201881_TC11
cg36375102_TC21
cg46492929_BC11
cg42246494_BC11
cg47500790_TC11
cg46430466_BC11
cg37176560_TC11
cg28702203_TC11
cg38660605_BC11
cg34386951_BC21
cg35989163_BC21
cg39959999_BC21
cg34084190_BC11
cg44927909_BC11
cg32809862_BC11
cg33573546_TC21
rs242399136_TC11
cg41694678_BC21
cg42228226_BC11
cg40388923_TC21
cg41066932_TC11
cg34101917_TC21
cg41692184_TC21
cg38807907_TC11
cg45743046_TC11
cg34386930_TC21
cg39746216_BC21
cg43573839_TC11
cg44904734_BC11
cg36294462_TC21
cg38328753_BC21
cg41623182_BC11
cg31109270_TC21
cg37483461_TC11
cg45141657_BC21
cg30874005_TC21
cg48216286_TC11
cg45119110_BC21
cg37722506_BC21
cg30819391_BC21
cg45462302_TC11
cg36546470_BC21
cg31321112_TC21
cg28987179_BC11
cg31570625_TC11
cg43379012_BC11
cg43425501_BC11
rs242399136_TC21
cg30526024_BC11
cg45014959_TC21
cg29978511_TC11
cg35994750_TC11
cg34386937_TC21
cg46294118_TC11
cg45206209_TC21
cg35967689_TC11
cg43426138_TC11
cg43898838_TC21
cg31999183_TC11
cg45662909_BC11
cg38144239_TC21
cg37562440_TC21
cg32052960_BC21
cg35875901_BC21
cg32802296_TC11
cg42689578_BC21
cg29812583_TC21
cg28888180_TC21
cg44672404_BC21
cg39159562_BC11
cg32004570_BC11
cg46874030_BC11
cg35121157_TC11
cg28742201_TC11
cg29380470_BC11
cg33948885_TC21
cg32730939_TC21
cg46101549_TC11
cg44271389_BC11
cg43425389_BC11
cg43426138_TC11
cg29249945_TC11
cg43967330_BC11
cg43967331_BC11
cg36099489_BC11
cg37459932_TC11
cg35989163_BC21
cg36099485_TC11
cg45136308_BC11
cg48215486_TC12
cg40463486_TC11
cg43425391_TC21
cg41345901_TC21
cg29979485_BC11
cg43425362_BC21
cg36546470_BC21
cg38244214_BC21
cg29979133_BC11
cg34425718_BC21
cg36326450_BC21
cg43379012_BC11
cg29979572_BC11
cg45018259_BC11
cg28991647_BC21
cg36126300_TC21
cg47178730_BC21
cg44672404_BC21
cg30539368_TC11
cg34254685_TC11
cg41823744_TC11
cg32730939_TC21
cg37531940_TC21
cg36971227_BC11
cg40155846_TC11
cg28341170_TC11
cg30114610_BC21
cg38328285_TC11
cg34576147_BC21
cg39240819_TC11
cg42671407_TC21
cg36294462_TC21
cg43425501_BC11
cg38144239_TC21
cg41315512_BC21
cg38052247_TC21
cg31570630_BC21
cg34131442_TC21
cg28904414_TC11
cg43426070_BC21
cg47070863_BC21
cg34142967_BC11
cg43425748_BC11
cg36420782_TC11
cg29978511_TC11
cg37139753_TC21
cg30912767_TC21
cg35027873_TC21
cg37520407_TC11
cg41456410_TC21
cg36126293_BC21
cg34507514_BC11
cg39172301_BC21
cg45839123_TC11
cg43425211_TC11
cg34084190_BC11
cg39582748_TC11
cg41315511_BC21
cg41325138_BC21
cg30264686_TC11
cg42246494_BC11
cg38658987_BC11
cg31423210_BC11
cg31999183_TC11
cg35027955_TC21
cg46492929_BC11
cg41692184_TC21
cg45789602_TC21
cg40035758_TC11
cg30114622_BC21
cg29174277_BC21
cg34425719_TC21
cg45141657_BC21
cg45119110_BC21
cg42785885_TC11
cg40385283_BC11
cg38574871_TC11
cg33406856_TC11
cg29894910_TC21
cg46774970_BC11
cg39959999_BC21
cg40733417_BC11
cg43425494_TC21
cg43426292_BC21
cg35994750_TC11
cg36143423_TC11
cg46898525_BC11
cg31014608_TC21
cg45118317_TC11
cg35635273_TC11
cg34022840_BC11
cg28464365_TC21
cg35254768_TC21
cg32045439_TC11
cg40824247_TC21
cg28120976_TC21
cg28415174_TC11
cg44552338_TC21
cg30676077_BC11
cg40600264_TC21
cg43303131_TC11
cg36972366_BC21
cg41230797_BC21
cg44399103_TC21
cg42758438_TC21
cg29498391_TC21
cg37769796_BC21
cg30667153_TC11
cg34487453_TC21
cg38762091_TC11
cg37452536_BC21
cg45316508_BC21
cg42531487_BC21
cg42279589_TC21
cg46805427_TC11
cg38694038_BC11
cg29012512_BC11
cg38283168_BC21
cg41697682_TC21
cg43164599_TC11
cg39899593_TC21
cg47318544_BC21
cg45252197_TC11
cg33950389_TC11
cg37620458_BC21
cg37830221_BC11
cg40872372_TC21
cg35964653_TC11
cg37452539_BC21
cg44878886_TC21
cg32532631_BC21
cg35131239_TC11
cg35931891_TC11
cg44324073_BC21
cg28415173_TC21
cg32075224_BC21
cg29161414_BC21
cg42758425_TC11
cg40101144_BC21
cg44256321_TC11
cg41963001_TC21
cg41431164_TC21
cg30256167_BC21
cg29476468_TC21
cg40975322_BC21
cg42480430_BC21
cg38018578_TC11
cg43023174_BC21
cg33385590_BC21
cg37563895_TC11
cg36661453_BC21
cg37769795_TC21
cg35112448_TC21
cg30324329_TC21
cg29139759_TC21
cg41697680_TC21
cg45118303_BC21
cg29027935_BC21
cg33746499_BC21
cg28695309_BC21
cg31445333_TC21
cg38755615_BC21
cg34863671_BC21
cg44987875_TC21
cg32480520_BC21
cg45489900_TC11
cg43531178_BC11
cg40735069_TC11
cg46717094_TC21
cg44987911_BC11
cg40560667_BC21
cg31486148_TC21
cg37893551_TC21
cg39383004_TC21
cg28415177_TC21
cg39296471_TC11
cg38247468_TC21
cg33819433_BC11
cg38848189_BC21
cg30552002_TC21
cg44945060_BC11
cg41974922_BC21
cg41845964_TC21
cg38971939_BC21
cg42481920_TC21
cg46023857_BC21
cg38664207_TC21
cg36391345_BC21
cg28511410_BC11
cg30466856_BC21
cg38383806_TC11
cg30466857_BC11
cg40154566_TC21
cg35025333_TC11
cg46580317_BC21
cg31604383_TC21
cg34466537_BC21
cg45015099_BC21
cg33664276_TC11
cg34530116_TC11
cg47628052_TC11
cg40006737_TC21
cg38047140_BC21
cg29201242_TC11
cg35025337_BC21
cg35025335_BC21
cg35027943_TC11
cg40006697_TC21
cg39307573_BC21
cg29593282_BC11
cg28391096_TC21
cg35294626_BC21
cg40419792_TC21
cg43964503_BC11
cg33238224_BC21
cg43763215_TC21
cg29179241_TC21
cg34496907_TC21
cg42555479_BC21
cg28904581_BC21
cg35568222_TC21
cg30872551_BC21
cg33931539_TC21
cg36557007_BC21
cg37946860_BC11
cg40923397_TC21
cg30397800_BC21
cg40006698_BC21
cg42210068_TC11
cg38566909_BC21
cg31604416_TC21
cg40333824_BC11
cg37711392_TC21
cg32296819_TC21
cg33238225_BC21
cg30795525_TC21
cg40336486_BC21
cg30021762_TC21
cg40370084_BC21
cg46534889_TC11
cg28751385_TC11
cg31947631_TC21
cg45975714_TC11
cg47261038_BC21
cg36932441_TC21
cg44117143_BC21
cg37312785_TC21
cg36160415_BC11
cg44097338_TC21
cg30041473_TC11
cg41526032_BC11
cg46971164_TC21
cg33161615_BC21
cg28594715_BC21
cg36089448_TC11
cg29533904_TC21
cg37314914_BC21
cg40784021_TC21
cg34508666_TC21
cg38516781_BC11
cg28659756_TC21
cg43854109_TC21
cg33853660_TC11
cg29557222_BC21
cg46436141_TC21
cg28682682_TC21
cg42999344_BC21
cg42751127_BC21
cg45149064_TC21
cg35989385_TC21
cg33093051_BC21
cg43048648_TC21
cg31088365_TC21
cg33627168_TC21
cg42742936_TC21
cg44116407_TC11
cg38087453_BC11
cg28660590_TC21
cg33389145_TC21
cg35932374_BC21
cg31986309_BC21
cg38111112_BC21
cg44041504_BC21
cg28983130_TC21
cg28512606_TC21
cg42278412_BC21
cg36791835_BC21
cg40336842_TC21
cg43546565_BC11
cg42900722_TC21
cg43547099_TC11
cg43547103_TC21
cg30413137_TC11
cg43546585_BC21
cg29612626_TC21
cg30926280_BC11
cg43546855_BC21
cg34530116_TC11
cg35025333_TC11
cg35287746_TC21
cg30466857_BC11
cg34841558_BC21
cg35025051_BC21
cg32731678_BC21
cg29483045_BC21
cg29814405_TC21
cg42021125_TC21
cg29248661_TC21
cg40139605_BC21
cg28958161_TC11
cg35025337_BC21
cg40125162_TC21
cg47403738_BC21
cg28849458_TC21
cg35025335_BC21
cg38238212_BC11
cg42213328_BC11
cg35256571_BC11
cg46690468_TC21
cg36156118_BC21
cg38238320_BC21
cg45015172_BC21
cg43546516_TC21
cg29201242_TC11
cg30258977_TC11
cg34022668_TC21
cg39278091_TC11
cg46680788_TC21
cg43766350_BC21
cg39168900_BC21
cg43546509_TC21
cg29912554_TC11
cg28591226_TC21
cg40751051_TC21
cg37188062_TC21
cg29143140_TC21
cg29898970_BC21
cg32083203_TC21
cg30850385_TC11
cg43452199_BC21
cg36461698_BC21
cg29308895_TC21
cg44514405_TC11
cg33766423_TC21
cg28356248_BC21
cg41512171_BC21
cg33413992_TC21
cg33473322_TC11
cg46502936_BC21
cg38238234_BC21
cg30116738_TC21
cg42874234_BC21
cg45406831_BC11
cg46113083_TC21
cg30258978_TC21
cg33527439_TC21
cg30854148_TC21
cg33527182_TC21
cg43525333_TC21
cg34278038_TC11
cg35025104_TC21
cg45947211_TC21
cg29498917_BC21
cg33555675_BC21
cg47262067_TC21
cg42596113_BC11
cg46507343_BC21
cg28873504_BC21
cg35025978_TC21
cg34597557_BC11
cg47403740_BC21
cg33568844_TC21
cg42587566_BC11
cg32565009_TC21
cg46335732_BC11
cg40963605_TC21
cg35123821_BC21
cg43546943_BC11
cg44366288_TC21
cg42670771_BC21
cg29746101_TC11
cg37488270_BC21
cg41207463_TC21
cg37488275_BC21
cg46502924_BC21
cg32478806_BC21
cg32299483_BC21
cg38238379_TC21
cg35459281_TC11
cg28148629_BC11
cg45197666_BC11
cg43444116_BC21
cg36221815_BC21
cg42314359_BC11
cg36157914_TC11
cg29547773_BC21
cg33672949_TC11
cg39180141_TC11
cg35434377_BC21
cg43915402_BC11
cg29477609_TC21
cg28604750_BC21
cg45937979_BC21
cg43346352_TC21
cg32331410_BC21
cg47405106_TC21
cg44649315_BC11
cg29561002_BC21
cg43127616_BC11
cg43331705_TC11
cg31348905_TC21
cg29547772_TC11
cg36156987_BC21
cg41066261_BC21
cg30125663_TC21
cg35327015_TC21
cg45989344_TC11
cg45147043_TC11
cg42514531_TC11
cg30847745_TC11
cg31419965_BC21
cg37945426_TC21
cg43558592_BC11
cg46815654_TC21
cg37225504_TC11
cg35262435_TC21
cg34565507_TC21
cg29896646_BC11
cg28126693_BC21
cg36851448_BC21
cg34058305_TC21
cg46945299_TC11
cg29366101_TC21
cg46947309_BC11
cg36156988_BC21
cg46891403_TC21
cg46526806_BC21
cg44176153_BC21
cg43322730_BC21
cg32759327_BC21
cg28581637_BC21
cg35944540_TC11
cg40021125_BC21
cg44753916_TC21
cg31388042_TC21
cg42293989_BC11
cg28169158_TC21
cg44887298_BC11
cg31984177_BC21
cg35708689_BC21
cg35254039_BC11
cg38569345_TC21
cg36100510_BC11
cg38656579_TC21
cg46367328_BC21
cg34265997_TC11
cg44984967_TC11
cg43989916_BC21
cg33706546_BC11
cg28848654_BC11
cg43558590_BC21
cg44076419_BC21
cg43677194_BC11
cg46873407_TC21
cg33947620_TC21
cg37435283_BC21
cg46305017_BC11
cg30664885_BC11
cg34139892_TC21
cg37067817_BC21
cg43468507_BC21
cg34787169_TC21
cg29167396_TC21
cg29885675_TC21
cg45395746_TC11
cg32673691_TC21
cg46407461_BC21
cg29230937_TC11
cg44576054_TC21
cg39366684_BC21
cg29230937_TC12
cg34976419_TC21
cg36156981_TC21
cg41908397_TC21
cg33382228_TC11
cg37683887_TC21
cg29826555_BC21
cg32691821_TC21
cg37095316_TC11
cg40387690_BC21
cg42155830_TC11
cg41115899_TC21
cg44540585_TC21
cg44366586_BC21
cg37773730_TC11
cg32617519_BC11
cg44957874_TC11
cg40480254_TC11
cg43952453_BC21
cg38069284_TC11
cg44957907_TC21
cg43667385_BC21
cg38763270_BC11
cg33797269_BC21
cg42915157_TC21
cg46595162_TC11
cg44390094_TC11
cg31566236_TC21
cg31070458_TC21
cg44891478_BC11
cg33750513_TC11
cg42729189_TC21
cg44012775_TC21
cg44540584_TC21
cg29965943_BC11
cg36131765_BC21
cg38278514_BC21
cg36162531_TC21
cg40055420_TC11
cg40480255_BC21
cg41247929_TC21
cg35172814_TC21
cg40480256_BC21
cg31231004_BC21
cg31486148_TC21
cg40154694_BC21
cg29203451_TC21
cg41519088_BC21
cg36131764_BC21
cg41165512_BC21
cg44943349_TC21
cg31849849_TC21
cg46520202_TC21
cg36336521_TC21
cg32628474_BC21
cg34579167_TC21
cg36919549_BC21
cg39483373_TC21
cg31187054_TC11
cg36154133_BC11
cg31624566_BC21
cg34473926_TC21
cg45393767_TC21
cg33850946_BC21
cg36154134_TC21
cg39307402_BC11
cg42750110_BC21
cg44685630_BC11
cg44013550_BC11
cg46580075_BC21
cg33759508_BC21
cg32470852_TC21
cg30300879_TC11
cg46452402_BC21
cg40019039_BC21
cg31443439_BC21
cg37193546_TC11
cg36427653_BC21
cg32981047_TC21
cg45983970_BC21
cg40222663_TC21
cg46618393_BC21
cg44808059_BC21
cg46105734_TC21
cg43087070_TC21
cg46231703_BC21
cg28798237_BC11
cg34147108_TC21
cg38224834_TC11
cg38251051_TC21
cg36845179_BC11
cg32466553_TC21
cg46854521_BC21
cg32628476_TC21
cg29147497_BC11
cg37972748_TC21
cg47232147_BC21
cg46407404_TC21
cg40058258_TC21
cg43762847_BC21
cg38288994_BC21
cg30470206_TC11
cg28871806_BC11
cg35839396_TC21
cg43259121_BC21
cg43825494_BC21
cg43951469_BC11
cg45268260_TC21
cg34019572_BC21
cg34019571_TC21
cg41523640_BC21
cg29848609_BC11
cg31220889_TC21
cg34430687_BC11
cg37246664_TC21
cg32629188_BC11
cg32094834_TC21
cg28126693_BC21
cg45653544_BC21
cg39771100_BC21
cg46116738_TC11
cg31002428_TC11
cg30846728_BC11
cg46945299_TC11
cg39128052_TC11
cg46817600_BC21
cg31489464_BC21
cg43615622_BC21
cg42910381_BC21
cg36334091_BC11
cg43624571_TC11
cg33776060_BC11
cg43824932_TC21
cg33808970_BC21
cg29440973_TC11
cg36157090_TC21
cg30751848_TC21
cg37067817_BC21
cg39646455_TC21
cg28986860_BC11
cg32673691_TC21
cg43347935_BC21
cg40123259_TC11
cg40133024_BC21
cg43553971_BC21
cg46268278_BC21
cg43071464_TC11
cg29589463_TC11
cg45874031_TC21
cg28848654_BC11
cg42293989_BC11
cg38008206_BC21
cg36157091_TC21
cg44983024_TC21
cg39812814_BC21
cg28997222_TC21
cg45141027_TC21
cg32202181_BC21
cg32417738_BC21
cg40393474_BC11
cg33750513_TC11
cg36850485_TC21
cg31489468_BC21
cg44494787_TC21
cg39430393_TC21
cg42161241_TC21
cg45728550_BC21
cg28878116_BC11
cg44013776_BC11
cg43960690_BC21
cg30200677_BC21
cg40127725_TC11
cg30469684_TC21
cg40018524_TC21
cg29324188_BC21
cg30868536_BC21
cg38276199_BC21
cg34574294_BC21
cg28743593_TC11
cg33776059_BC11
cg44068301_BC21
cg31489467_BC21
cg29848610_BC11
cg45367683_BC11
cg44012878_BC21
cg30931421_BC21
cg33181181_TC11
cg29331026_BC21
cg43871777_BC21
cg39243767_BC21
cg29102077_BC21
cg40050873_BC21
cg39955362_TC21
cg39141301_BC21
cg47213679_BC21
cg46407461_BC21
cg42553950_TC21
cg39687499_TC11
cg29505517_BC21
cg36203649_TC21
cg30542530_TC21
cg36538902_TC21
cg28222382_TC21
cg37817035_TC11
cg31444602_BC21
cg33954018_BC21
cg28222383_BC21
cg37424520_BC21
cg31916879_BC11
cg30470672_TC21
cg31062427_TC11
cg31543657_BC11
cg28423885_TC21
cg38519727_TC11
cg37717035_BC21
cg32111166_TC21
cg40158462_BC21
cg45143343_TC11
cg28258914_TC21
cg36938719_BC21
cg43454649_BC21
cg36514374_BC21
cg29049760_TC21
cg34628121_TC21
cg34630103_TC11
cg44189936_TC21
cg44189924_TC21
cg45833085_TC11
cg41636061_BC11
cg32014326_BC11
cg44013333_BC21
cg40965569_BC21
cg39750084_BC11
cg32091379_BC21
cg40158465_TC21
cg44013546_BC21
cg36998284_BC11
cg33084371_BC21
cg47288757_BC21
cg42095593_BC11
cg36449118_BC21
cg36144911_TC21
cg33712433_TC21
cg32091378_BC21
cg31605770_TC21
cg46279727_BC21
cg29771685_TC21
cg47335820_BC21
cg31021625_TC21
cg29991014_BC21
cg28424126_TC21
cg35257939_TC21
cg46115867_BC21
cg40303806_TC11
cg36925714_BC21
cg44008264_BC11
cg44013550_BC11
cg43259000_BC11
cg36383953_BC11
cg38494936_TC21
cg40946042_BC11
cg41904307_BC21
cg33408391_BC11
cg36383952_TC21
cg45143337_BC21
cg34958726_TC21
cg43268976_BC21
cg28877332_TC21
cg44386186_BC21
cg30052814_BC21
cg35990377_TC21
cg34518511_BC21
cg39278091_TC11
cg39950093_BC21
cg37190163_BC11
cg41906859_BC21
cg41267864_BC21
cg42595805_BC21
cg29550159_BC21
cg36325275_BC21
cg28727113_BC11
cg38425568_TC21
cg43822049_BC11
cg44010285_TC21
cg31200415_TC11
cg42278573_TC21
cg44040901_BC21
cg42595804_BC21
cg47288759_TC21
cg44658754_TC21
cg41923833_BC21
cg40387104_TC21
cg36072308_TC21
cg31916883_TC21
cg41717950_TC11
cg32093742_BC21
cg44635295_BC21
cg29746545_BC21
cg42071327_TC21
cg34518639_BC21
cg33420989_BC21
cg40946620_BC21
cg41082671_BC21
cg28295789_BC21
cg44390433_BC21
cg45069262_TC21
cg32529013_BC21
cg46861883_BC21
cg42217694_TC21
cg38065819_TC11
cg29397757_BC11
cg29455042_TC21
cg39127761_BC21
cg43964503_BC11
cg34198835_BC11
cg33414027_BC21
cg33769836_TC21
cg28595504_BC11
cg33027652_TC21
cg40728716_TC11
cg36988794_BC21
cg38746620_TC21
cg37983868_TC11
cg36563013_TC21
cg36452188_TC21
cg32996015_BC21
cg28191635_TC11
cg34509506_TC21
cg45514662_TC21
cg39662756_BC21
cg28197264_BC21
cg43728683_TC21
cg41799810_TC21
cg38065820_BC21
cg36988783_TC21
cg44840484_TC21
cg38047140_BC21
cg36988824_TC21
cg33571011_TC11
cg30795107_TC21
cg35625263_TC11
cg43764653_BC11
cg28886193_TC11
cg47235349_BC21
cg36521639_TC21
cg36452178_TC21
cg36563016_BC11
cg33420989_BC21
cg45364365_BC11
cg44735114_TC21
cg38065913_BC11
cg32672432_BC21
cg29300793_TC21
cg40006737_TC21
cg32201012_BC21
cg45234587_TC21
cg29688411_TC21
cg32995820_TC21
cg28229704_BC21
cg29560538_BC21
cg41403052_TC21
cg44011020_BC21
cg32459480_BC21
cg40292290_TC11
cg38546466_BC21
cg37081260_TC21
cg28883392_TC21
cg29476633_TC21
cg38303323_TC11
cg35251893_BC21
cg35109685_TC21
cg46989013_TC21
cg36987852_BC11
cg28146697_TC21
cg41349799_TC21
cg46449138_BC21
cg28594065_TC11
cg46861741_BC21
cg36988818_TC21
cg41701472_BC11
cg40006698_BC21
cg32083685_TC21
cg33027644_BC21
cg35112261_TC11
cg28873116_TC21
cg38065910_BC21
cg44893383_TC21
cg41213523_TC21
cg43728739_BC11
cg36296032_BC21
cg40048207_TC21
cg44011109_BC21
cg30022406_BC21
cg40104518_BC21
cg33243678_TC11
cg45115726_TC21
cg39755163_TC21
cg30271063_TC21
cg47363536_BC11
cg45115375_TC21
cg29164506_TC21
cg35252021_TC21
cg38922596_TC21
cg37714733_BC21
cg34012351_BC21
cg28794162_BC21
cg40755001_TC21
cg34612114_BC21

## Sheet: ST8_Deconvolution_Data_Models
Entity	Tumor	Normal	BCell	CD4	CD8	Eosinophil	Monocyte	Neutrophil	NK	Treg	Immune
ATRT_MYC	0.656931	0	0	0	0.0178478	0.00661085	0.214901	0.00684656	0.0233849	0.0734777	0.343069
ATRT_SHH	0.677065	0.236641	0	0.0013162	0.0474281	0.0166583	0.00453245	0.0057542	0.00167915	0.00892546	0.0862938
Brainstem	0.0434158	0.914748	0.00318445	0.00469103	0.00347731	0.00750033	0.0119444	0.000497994	0.0052586	0.005282	0.0418361
Cerebellum	0.148751	0.795191	0.0391827	0.000237525	0.00932333	0.00165823	0	0.00536518	0.000290867	0	0.0560578
Cerebralcortex	0.0054288	0.926656	0	0.00473783	0.00321138	0.00311381	0.0246625	0.0042303	0.00624332	0.0217156	0.0679148
CNS_neuroblastoma_FOXR2	0.362858	0.541126	0.00659151	0.0273161	0.00841785	0.00626942	0.0219187	0	0.00643068	0.0190714	0.0960157
Ependymoma_YAP	0.55892	0	0.00770568	0	0.00931424	0	0.329474	0.000181834	0.0268961	0.067508	0.44108
Ependymoma_ZFTA	0.756871	0.0519375	0.00307112	0	0.0218714	0.0188997	0.0773573	0.0199176	0.0146373	0.035437	0.191191
ETMR	0.166093	0.799987	0	0.0116043	0.0122907	0.0100247	0	0	0	0	0.0339197
GBM	0.722939	0.0468672	0.00355801	0.0238464	0.0215679	0.0238855	0.103454	0.00339644	0.019175	0.03131	0.230193
H3G34	0.940749	0	0	0.00291014	0.00554044	0	0.00884629	0.00340711	0.0145076	0.0240399	0.0592515
H3K27M	0.838937	0.0750332	0	0.00114033	0.0145796	0.00470422	0.0225565	0.0035977	0.0195803	0.0198709	0.0860297
IDH_H3WT	0.866437	0.0571168	0.000426075	0.0100067	0.0055881	0.0123354	0.018896	0.00563917	0.0120959	0.0114592	0.0764466
MB_Gr_3	0.867669	0.0324119	0.0386142	0.0199209	0.0118536	0.00534309	0	0.0142854	0.00189418	0.00800793	0.0999193
MB_Gr_4	0.523887	0.302048	0.0159567	0	0.0178233	0.00438792	0.0618593	0.00150512	0.0252263	0.0473059	0.174065
MB_SHH	0.742732	0.167195	0.0639563	0.00481225	0.0047743	0.000140087	0	0.0159469	0.000442844	0	0.0900727
MB_WNT	0.150103	0.810914	0.00121113	0.00929025	0.00369076	0.00873612	0.00362993	0.00499244	0.00743289	0	0.0389835
MPNST	0.559641	0	0.00184169	0	0.00499565	0.00191331	0.262364	0.0971227	0.0267043	0.045418	0.440359
MRT	0.633521	0	0	0	0.0178183	0.00438955	0.237402	0.0168027	0.0293441	0.0607227	0.366479
Neuroblastoma_MYCN	0.809734	0	0.0317476	0.0893866	0.000615413	0.0518995	0.00049751	0.00273213	0.0130732	0.000314478	0.190266
other	0.82064	0	0	0	0	0	0	0.15523	0	0.0241299	0.17936
PilocyticAstrocytoma	0.560352	0.193038	0.00104799	0	0.0261749	0.0237115	0.0745772	0.0211393	0.0356382	0.0643211	0.24661
PlexusCarcinoma	0.45383	0.475906	0.0189861	0.0278165	0.00566448	0.015454	0	0.000654414	0.00168798	0	0.0702635
Thalamus	0.00809399	0.931669	2.31887e-05	0.0191694	0.00227464	0.00925159	0.0210315	0.00016851	0.0023238	0.00599419	0.0602369
